# Supplementary material for: Antimicrobial Properties of Bacillus Probiotics as Animal Growth Promoters
Source: MDPI journal article supplement (doi:10.3390/antibiotics12020407), 2023-02-17

## Supplementary information for

# Antimicrobial *Bacillus* probiotics as animal growth promoters

Charlie Tran<sup>1</sup>, Darwin Horyanto<sup>2,4</sup>, Dragana Stanley<sup>2</sup>, Ian E. Cock<sup>3</sup>, Xiaojing Chen<sup>4</sup> and Yunjiang Feng<sup>1,\*</sup>

<sup>1</sup> Griffith Institute for Drug Discovery (GRIDD), Griffith University, Nathan, QLD, 4111, Australia

<sup>2</sup> Institute for Future Farming Systems, Central Queensland University, Rockhampton, QLD, 4702, Australia.

<sup>3</sup> School of Environment and Science, Griffith University, Nathan, QLD 4111, Australia

<sup>4</sup> Bioproton Pty Ltd, Acacia Ridge, QLD, 4110, Australia

\* Correspondence: y.feng@griffith.edu.au

### List of supporting information:

**Table S1** Experimental NMR data of compound 1 in DMSO - *d*<sub>6</sub> at 25°C

**Figure S1** (+)-LRESIMS spectrum of compound 1

**Figure S2** <sup>1</sup>H NMR (800 MHz, DMSO) spectrum of compound 1

**Figure S3** <sup>1</sup>H - <sup>1</sup>H COSY spectrum of compound 1 in DMSO

**Figure S4** HSQC spectrum of compound 1 in DMSO

**Figure S5** HMBC spectrum of compound 1 in DMSO

**Table S2** Experimental NMR data of compound 2 in DMSO - *d*<sub>6</sub> at 25°C

**Figure S6** (+)-LRESIMS spectrum of compound 2

**Figure S7** <sup>1</sup>H NMR (800 MHz, DMSO) spectrum of compound 2

**Figure S8** <sup>1</sup>H - <sup>1</sup>H COSY spectrum of compound 2 in DMSO

**Figure S9** HSQC spectrum of compound 2 in DMSO

**Figure S10** HMBC spectrum of compound 2 in DMSO

**Table S3** Experimental NMR data of compound 3 in DMSO - *d*<sub>6</sub> at 25°C

**Figure S11** (+)-LRESIMS spectrum of compound 3

**Figure S12**  $^1\text{H}$  NMR (800 MHz, DMSO) spectrum of compound 3

**Figure S13**  $^1\text{H}$  -  $^1\text{H}$  COSY spectrum of compound 3 in DMSO

**Figure S14** HSQC spectrum of compound 3 in DMSO

**Figure S15** HMBC spectrum of compound 3 in DMSO

**Table S4** Experimental NMR data of compound 4 in DMSO -  $d_6$  at 25°C

**Figure S16** (+)-LRESIMS spectrum of compound 4

**Figure S17**  $^1\text{H}$  NMR (800 MHz, DMSO) spectrum of compound 4

**Figure S18**  $^1\text{H}$  -  $^1\text{H}$  COSY spectrum of compound 4 in DMSO

**Figure S19** HSQC spectrum of compound 4 in DMSO

**Figure S20** HMBC spectrum of compound 4 in DMSO

**Table S5** Experimental NMR data of compound 5 in DMSO -  $d_6$  at 25°C

**Figure S21** (+)-LRESIMS spectrum of compound 5

**Figure S22**  $^1\text{H}$  NMR (800 MHz, DMSO) spectrum of compound 5

**Figure S23**  $^1\text{H}$  -  $^1\text{H}$  COSY spectrum of compound 5 in DMSO

**Figure S24** HSQC spectrum of compound 5 in DMSO

**Figure S25** HMBC spectrum of compound 5 in DMSO

**Table S6** Experimental NMR data of compound 6 in DMSO -  $d_6$  at 25°C

**Figure S26** (+)-LRESIMS spectrum of compound 6

**Figure S27**  $^1\text{H}$  NMR (800 MHz, DMSO) spectrum of compound 6

**Figure S28**  $^1\text{H}$  -  $^1\text{H}$  COSY spectrum of compound 6 in DMSO

**Figure S29** HSQC spectrum of compound 6 in DMSO

**Figure S30** HMBC spectrum of compound 6 in DMSO

**Table S7** Experimental NMR data of compound 7 in DMSO -  $d_6$  at 25°C

**Figure S31** (+)-LRESIMS spectrum of compound 7

**Figure S32**  $^1\text{H}$  NMR (800 MHz, DMSO) spectrum of compound 7

**Figure S33**  $^1\text{H}$  -  $^1\text{H}$  COSY spectrum of compound 7 in DMSO

**Figure S34** HSQC spectrum of compound 7 in DMSO

**Figure S35** HMBC spectrum of compound 7 in DMSO

**Table S8** Experimental NMR data of compound 8 in DMSO -  $d_6$  at 25°C

**Figure S36** (+)-LRESIMS spectrum of compound 8

**Figure S37**  $^1\text{H}$  NMR (800 MHz, DMSO) spectrum of compound 8

**Figure S38**  $^1\text{H}$  -  $^1\text{H}$  COSY spectrum of compound 8 in DMSO

**Figure S39** HSQC spectrum of compound 8 in DMSO

**Figure S40** HMBC spectrum of compound 8 in DMSO

**Figure S41** LC-MS chromatograms of caecum extracts produced from a single animal sample fed with *Bacillus* composition F1.

**Table S9** Antimicrobial activity of EtoAc and crude extracts of *Bacillus* strains (green tick: active; red cross: inactive)

**Figure S42** Stacked  $^1\text{H}$  NMR spectra of *Bacillus* EtoAC extracts

**Table S1** Experimental NMR data of C16 Surfactin C in DMSO -  $d_6$  at 25°C

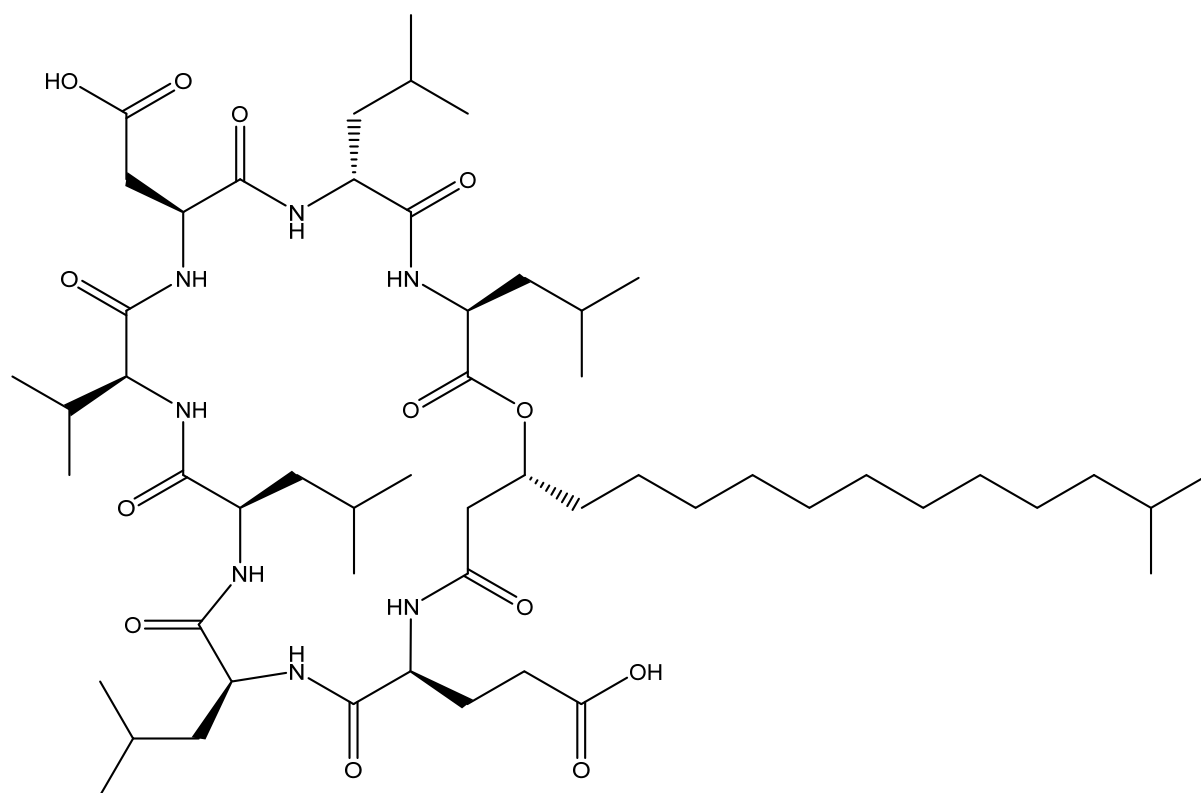

| Position |    | $\delta_c$ | $\delta_H$ (J in Hz) |
|----------|----|------------|----------------------|
| Glu1     | NH | -          | 8.44, (d), 6.6       |
|          | CO | 172.2      | -                    |

|                 |               |       |                |
|-----------------|---------------|-------|----------------|
|                 | $\alpha$ -C   | 51.1  | 4.04, (q), 4.8 |
|                 | $\beta$ -C    | 39.5  | 1.63, (m)      |
|                 | $\gamma$ -C   | 39.3  | 1.63, (m)      |
|                 | COOH          |       |                |
| Leu2            | NH            | -     | 8.13 d, 7.2    |
|                 | CO            | 173.6 | -              |
|                 | $\alpha$ -C   | 52.3  | 4.16, (m)      |
|                 | $\beta$ -C    | 24.5  | 1.47, (m)      |
|                 | $\gamma$ -C   | 39.8  | 1.50, (m)      |
|                 | $\delta_1$ -C | 23.7  | 0.87, (m)      |
|                 | $\delta_2$ -C | 23.4  | 0.86, (m)      |
| Leu3            | NH            | -     | 7.60, (s)      |
|                 | CO            | 157.5 | -              |
|                 | $\alpha$ -C   | 51.4  | 4.32, (q), 5.6 |
|                 | $\beta$ -C    | 24.7  | 1.52, (m)      |
|                 | $\gamma$ -C   | 39.0  | 1.26, (m)      |
|                 | $\delta_1$ -C | 23.8  | 0.86, (m)      |
|                 | $\delta_2$ -C | 22.9  | 0.82, (m)      |
| Val4            | NH            | -     | 8.00, (s)      |
|                 | CO            | -     | -              |
|                 | $\alpha$ -C   | 51.2  | 4.02, (t), 7.6 |
|                 | $\beta$ -C    | 30.3  | 2.02, (m)      |
|                 | $\gamma_1$ -C | 22.9  | 0.90, (m)      |
|                 | $\gamma_2$ -C | 22.6  | 0.76, (m)      |
| Asp5            | NH            | -     | 8.19, (s)      |
|                 | CO            | -     | -              |
|                 | $\alpha$ -C   | 49.9  | 4.55, (m)      |
|                 | $\beta$ -C    | 35.9  | 2.63, (t), 8.0 |
|                 | COOH          |       |                |
| Leu6            | NH            | -     | 7.61, (s)      |
|                 | CO            | -     | -              |
|                 | $\alpha$ -C   | 51.6  | 4.33, (m)      |
|                 | $\beta$ -C    | 40.3  | 1.46, (m)      |
|                 | $\gamma$ -C   | 23.4  | 1.14, (m)      |
|                 | $\delta_1$ -C | 23.1  | 0.89, (m)      |
|                 | $\delta_2$ -C | 22.3  | 0.88, (m)      |
| Leu7            | NH            | -     | 7.90, (s)      |
|                 | CO            | -     | -              |
|                 | $\alpha$ -C   | 52.3  | 4.14, (m)      |
|                 | $\beta$ -C    | 30.1  | 1.25, (m)      |
|                 | $\gamma$ -C   | 41.6  | 1.56, (m)      |
|                 | $\delta_1$ -C | 23.1  | 0.83, (m)      |
|                 | $\delta_2$ -C | 22.7  | 0.80, (m)      |
| Fatty acid part | C1            | 171.4 | -              |
|                 | C2            | 41.7  | 2.38, (m)      |
|                 | C3            | 71.6  | 5.06, (m)      |
|                 | C4            | 33.7  | 1.51, (m)      |
|                 | C5-15         | 22.3  | 0.80, (m)      |
|                 | C16           | 29.7  | 2.03, (m)      |
|                 | C17           | 22.1  | 0.80, (m)      |
|                 | C18           | 24.3  | 0.81, (m)      |

**Figure S1** (+)-LRESIMS spectrum of compound 1

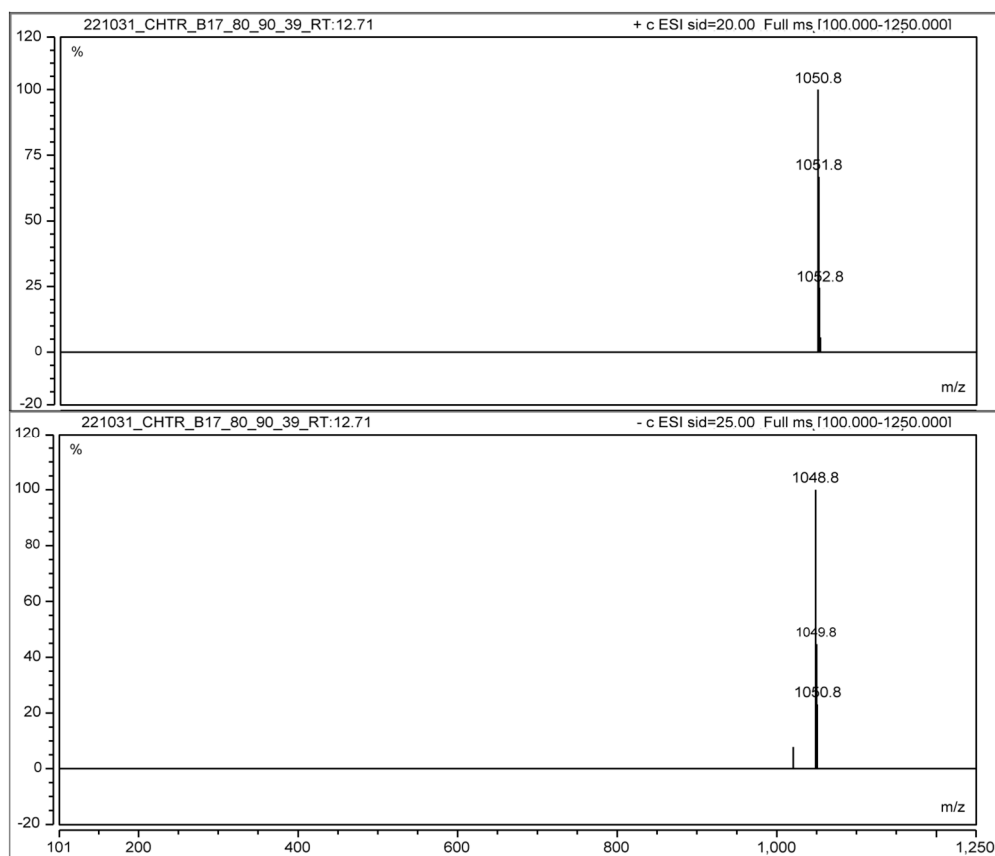

**Figure S2**  $^1\text{H}$  NMR (800 MHz, DMSO) spectrum of compound 1

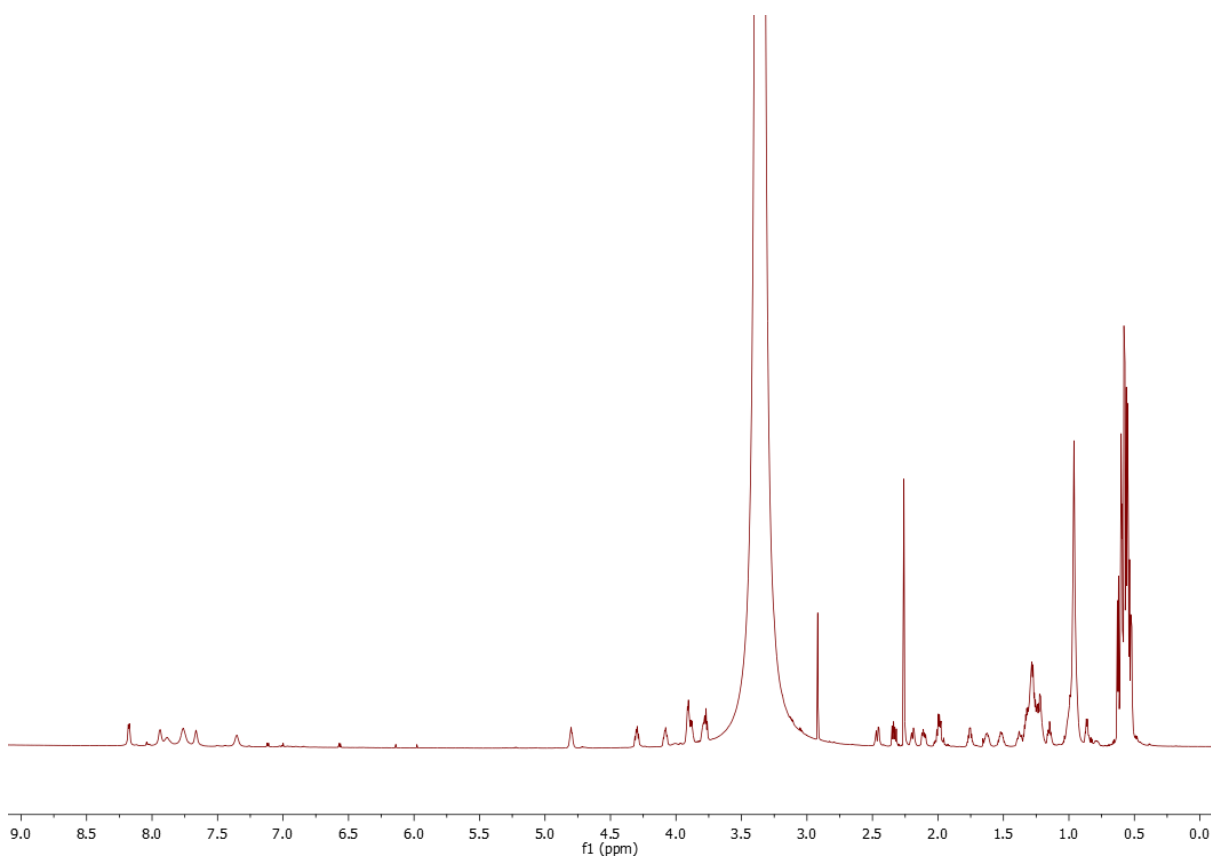

**Figure S3**  $^1\text{H}$ - $^1\text{H}$  COSY spectrum of compound 1 in DMSO

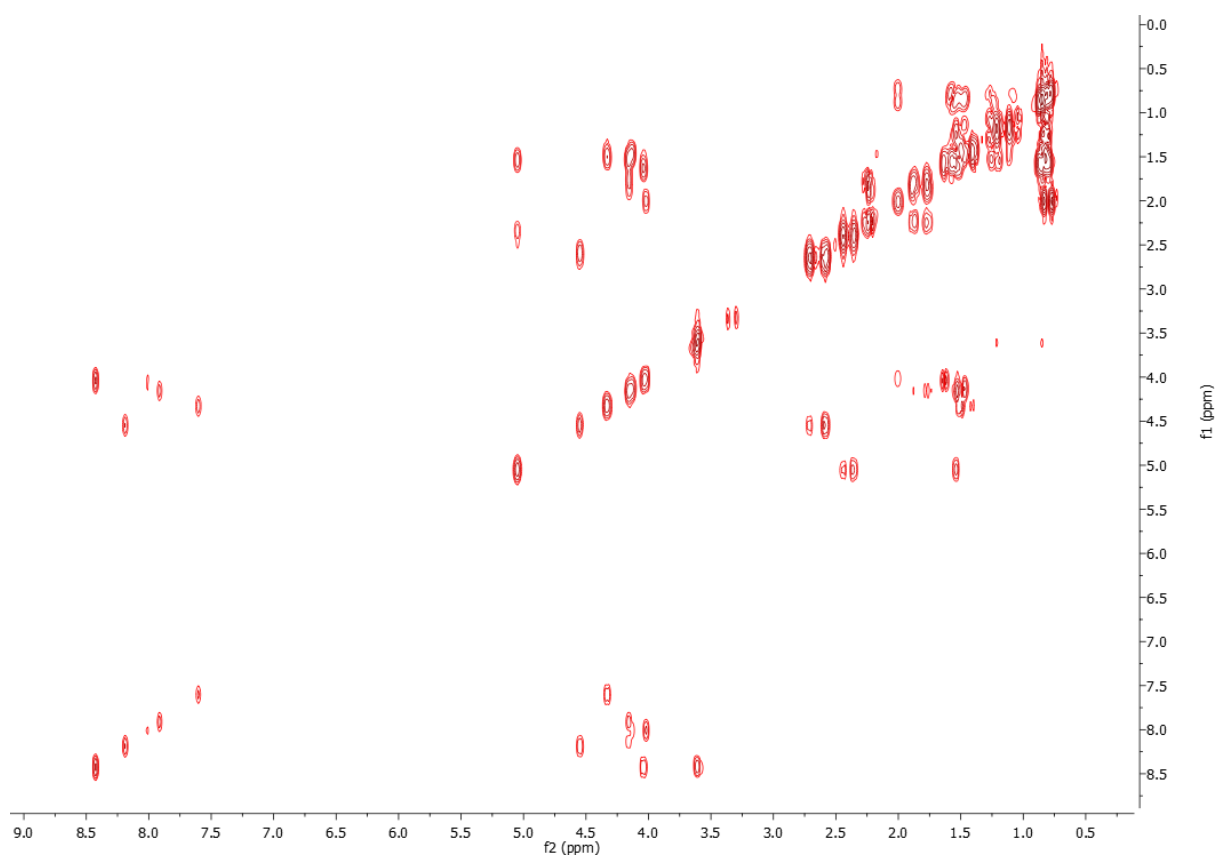

**Figure S4** HSQC spectrum of compound 1 in DMSO

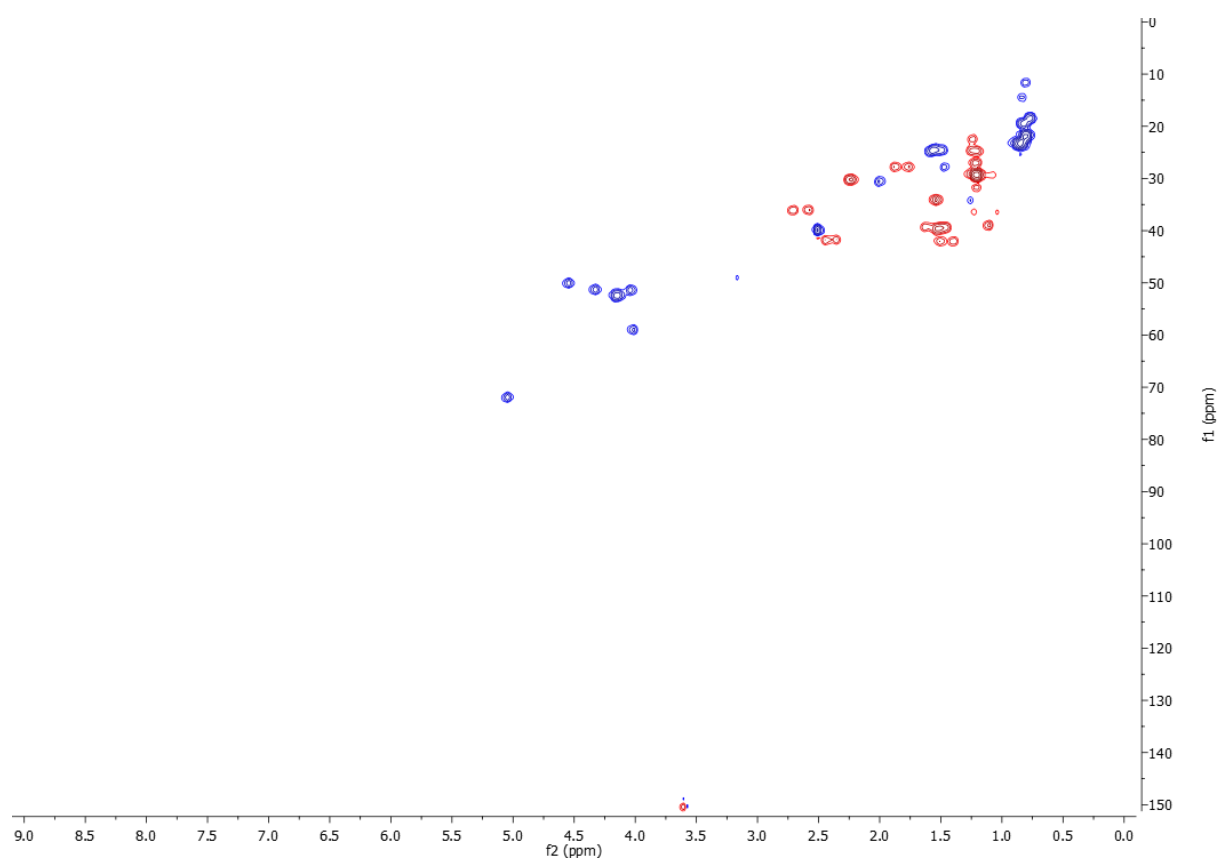

**Figure S5** HMBC spectrum of compound 1 in DMSO

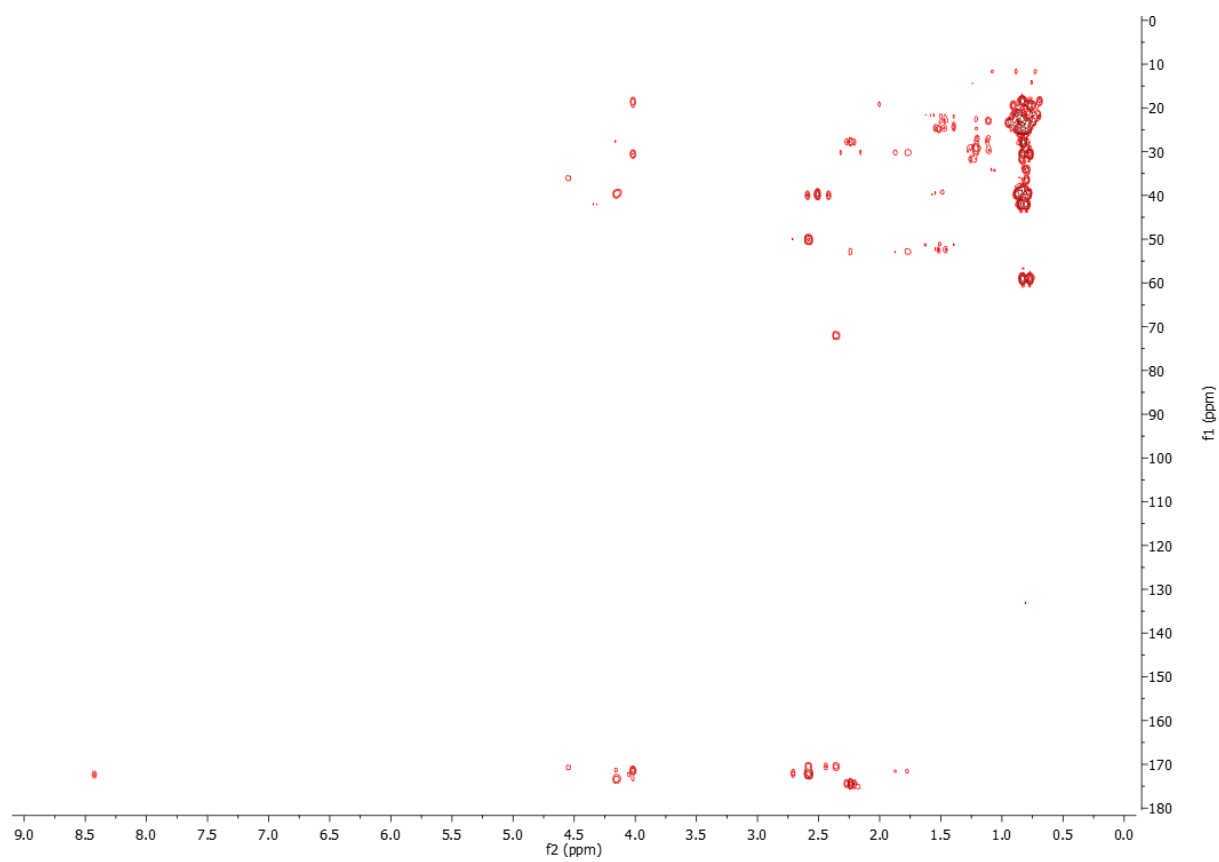

**Table S2** Experimental NMR data of compound 2 in DMSO -  $d_6$  at 25°C

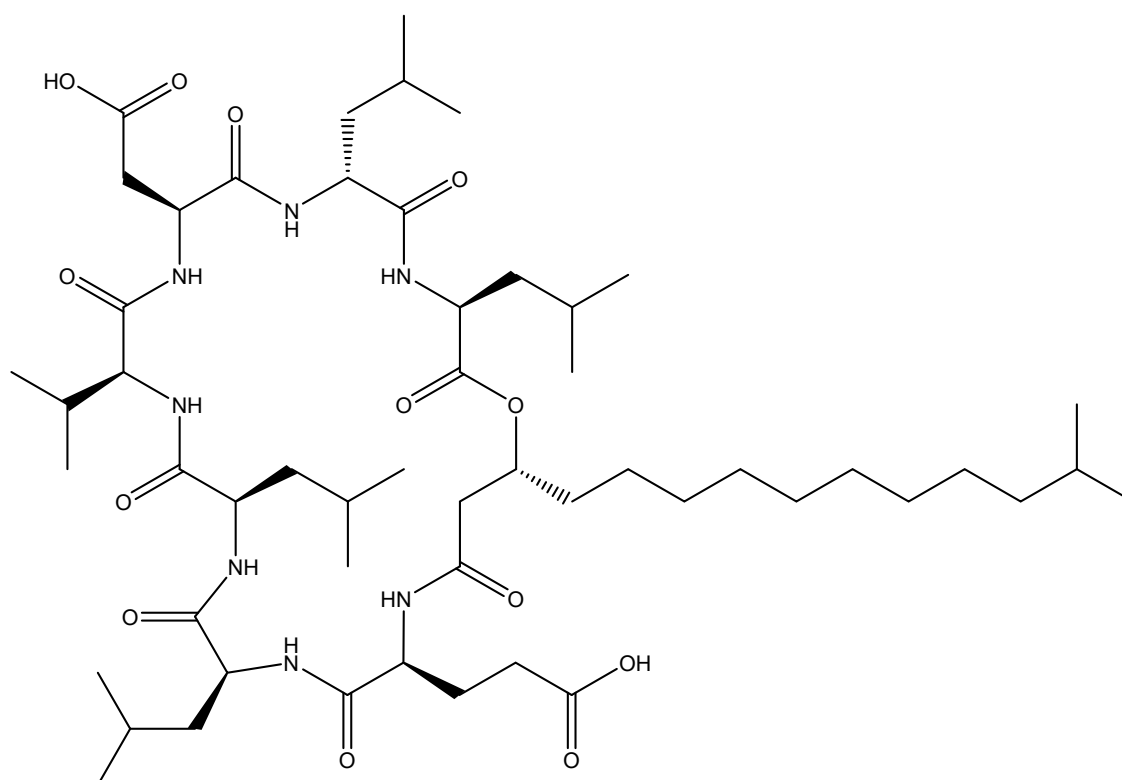

| Position |               | $\delta_c$ | $\delta_H$ (J in Hz) |
|----------|---------------|------------|----------------------|
| Glu1     | NH            | -          | 8.14, (d), 6.6       |
|          | CO            | 170.5      | -                    |
|          | $\alpha$ -C   | 50.2       | 4.55, (q), 4.8       |
|          | $\beta$ -C    | 36.3       | 2.58, (m)            |
|          | $\gamma$ -C   | 40.3       | 2.74, (dd), 4.8/12.8 |
|          | COOH          | 172.3      | 12.0                 |
| Leu2     | NH            | -          | 8.44, d, 7.2         |
|          | CO            | 172.4      | -                    |
|          | $\alpha$ -C   | 51.5       | 4.08, (m)            |
|          | $\beta$ -C    | 39.0       | 1.66 (m)             |
|          | $\gamma$ -C   | 28.5       | 1.55 (m)             |
|          | $\delta_1$ -C | 22.5       | 0.83, (m)            |
| Leu3     | $\delta_2$ -C | 22.5       | 0.83, (m)            |
|          | NH            | -          | 7.60, (s)            |
|          | CO            | 172.2      | -                    |
|          | $\alpha$ -C   | 51.2       | 4.37, (q), 5.6       |
|          | $\beta$ -C    | 42.1       | 1.50, (m)            |
|          | $\gamma$ -C   | 39.8       | 1.60, (m)            |
| Val4     | $\delta_1$ -C | 22.5       | 0.87, (m)            |
|          | $\delta_2$ -C | 22.5       | 0.87, (m)            |
|          | NH            | -          | 8.05, (s)            |
|          | CO            | 171.1      | -                    |
|          | $\alpha$ -C   | 59.0       | 4.04, (t), 7.6       |
|          | $\beta$ -C    | 30.6       | 2.01, (m)            |
|          | $\gamma_1$ -C | 18.6       | 0.81, (m)            |
|          | $\gamma_2$ -C | 19.5       | 0.89, (m)            |



|                    |               |       |                            |
|--------------------|---------------|-------|----------------------------|
| Asp5               | NH            | -     | 7.99, (s)                  |
|                    | CO            | 173.4 | -                          |
|                    | $\alpha$ -C   | 52.7  | 4.17, (m)                  |
|                    | $\beta$ -C    | 30.1  | 1.80, (m) / 2.24, (t), 8.0 |
| Leu6               | COOH          | 174.5 | 12.33, (s)                 |
|                    | NH            | -     | 7.81, (s)                  |
|                    | CO            | 171.1 | -                          |
|                    | $\alpha$ -C   | 52.8  | 4.17, (m)                  |
|                    | $\beta$ -C    | 39.9  | 1.50 (m)/1.61 (m)          |
|                    | $\gamma$ -C   | 21.9  | 0.80                       |
|                    | $\delta_1$ -C | 18.1  | 0.81 (m)                   |
|                    | $\delta_2$ -C | 19.2  | 0.88 (m)                   |
| Leu7               | NH            | -     | 7.81, (s)                  |
|                    | CO            | 173.4 | -                          |
|                    | $\alpha$ -C   | 52.8  | 4.17, (m)                  |
|                    | $\beta$ -C    | 39.9  | 1.50 (m)/1.61 (m)          |
|                    | $\gamma$ -C   | 21.9  | 0.80                       |
|                    | $\delta_1$ -C | 18.1  | 0.81 (m)                   |
|                    | $\delta_2$ -C | 19.2  | 0.88 (m)                   |
| Fatty<br>acid part | C1            | 170.3 | -                          |
|                    | C2            | 41.9  | 2.50 (m)/2.33 (m)          |
|                    | C3            | 71.8  | 5.08, (m)                  |
|                    | C4            | 39.3  | 1.53, (m)                  |
|                    | C5-15         | 26.1  | 0.84, (m)                  |
|                    | C16           | 24.6  | 1.62, (m)                  |
|                    | C17           | 23.2  | 0.91, (m)                  |
|                    | C18           | 23.2  | 0.91, (m)                  |

**Figure S6** (+)-LRESIMS spectrum of compound 2

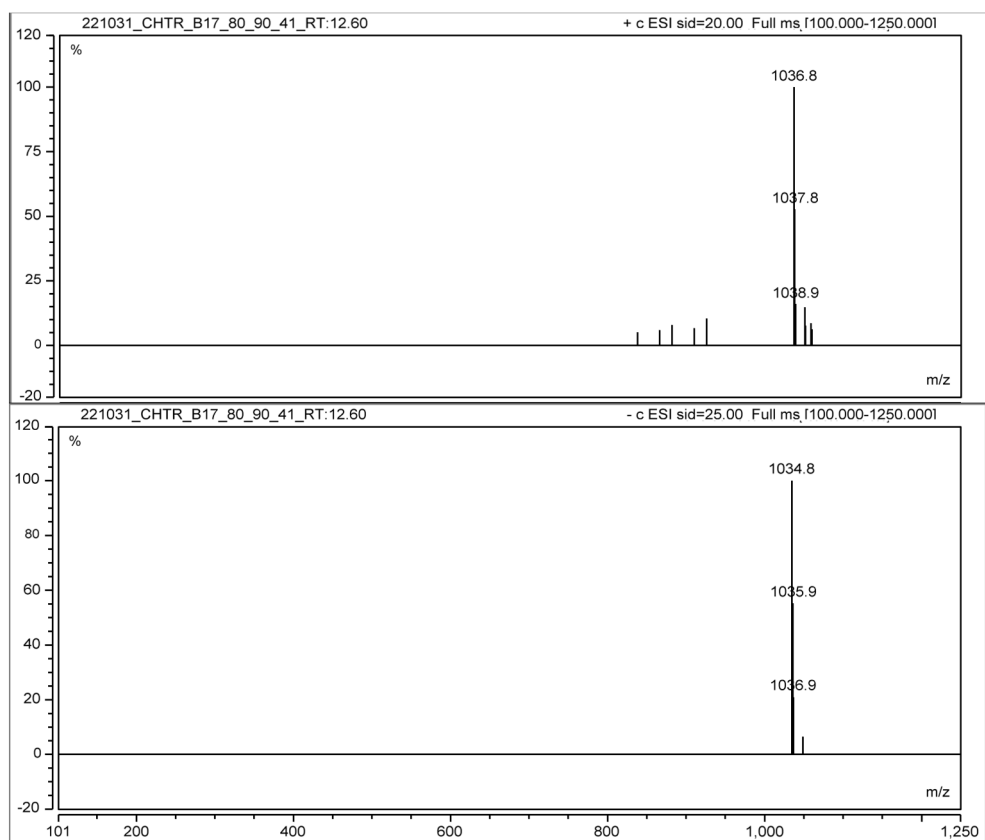

**Figure S7**  $^1\text{H}$  NMR (800 MHz, DMSO) spectrum of compound 2

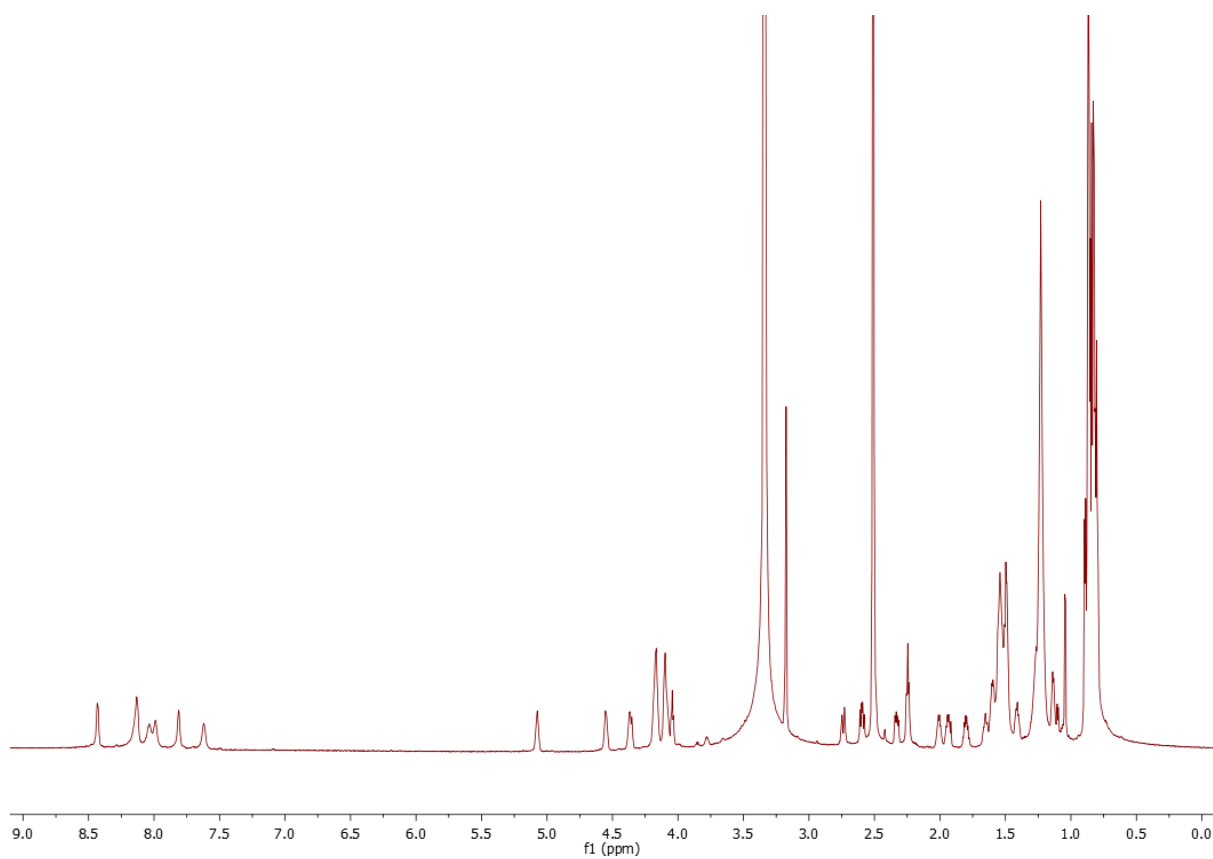

**Figure S8**  $^1\text{H}$  -  $^1\text{H}$  COSY spectrum of compound 2 in DMSO

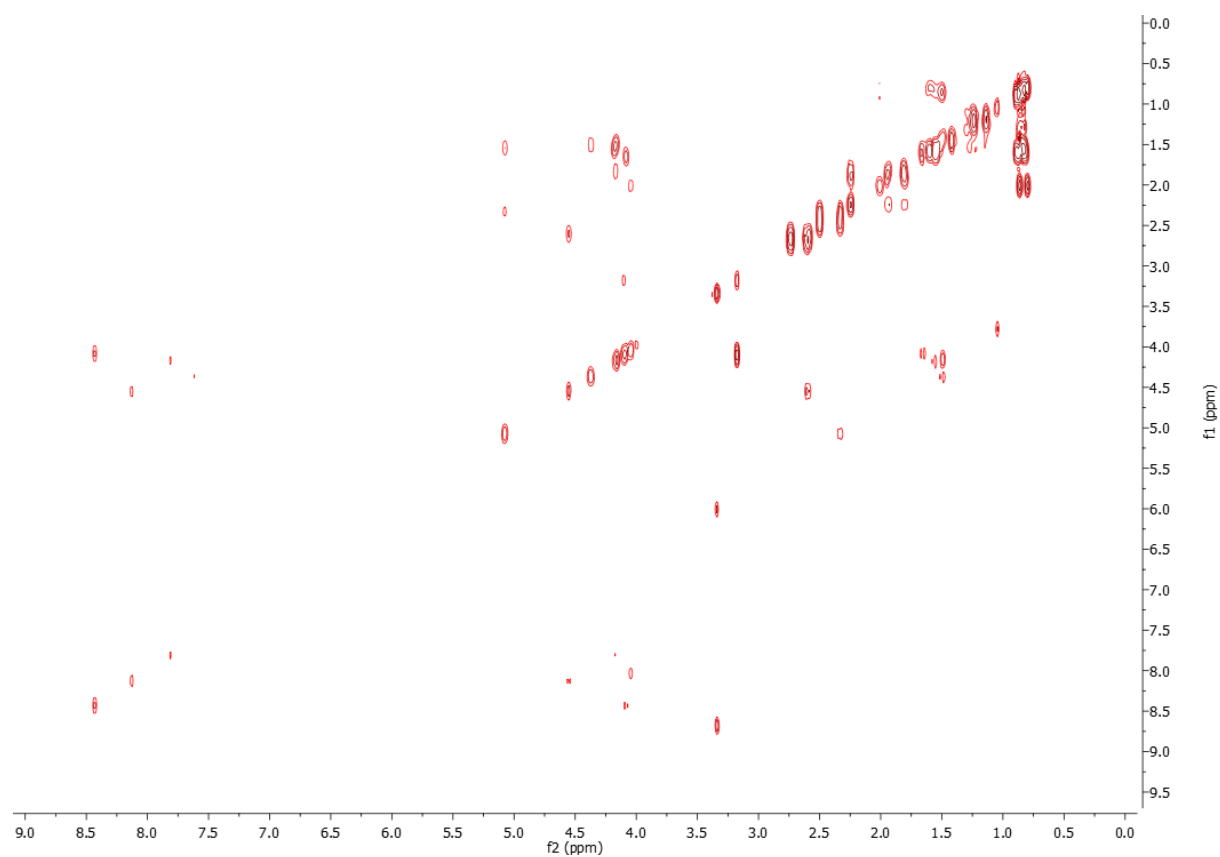

**Figure S9** HSQC spectrum of compound 2 in DMSO

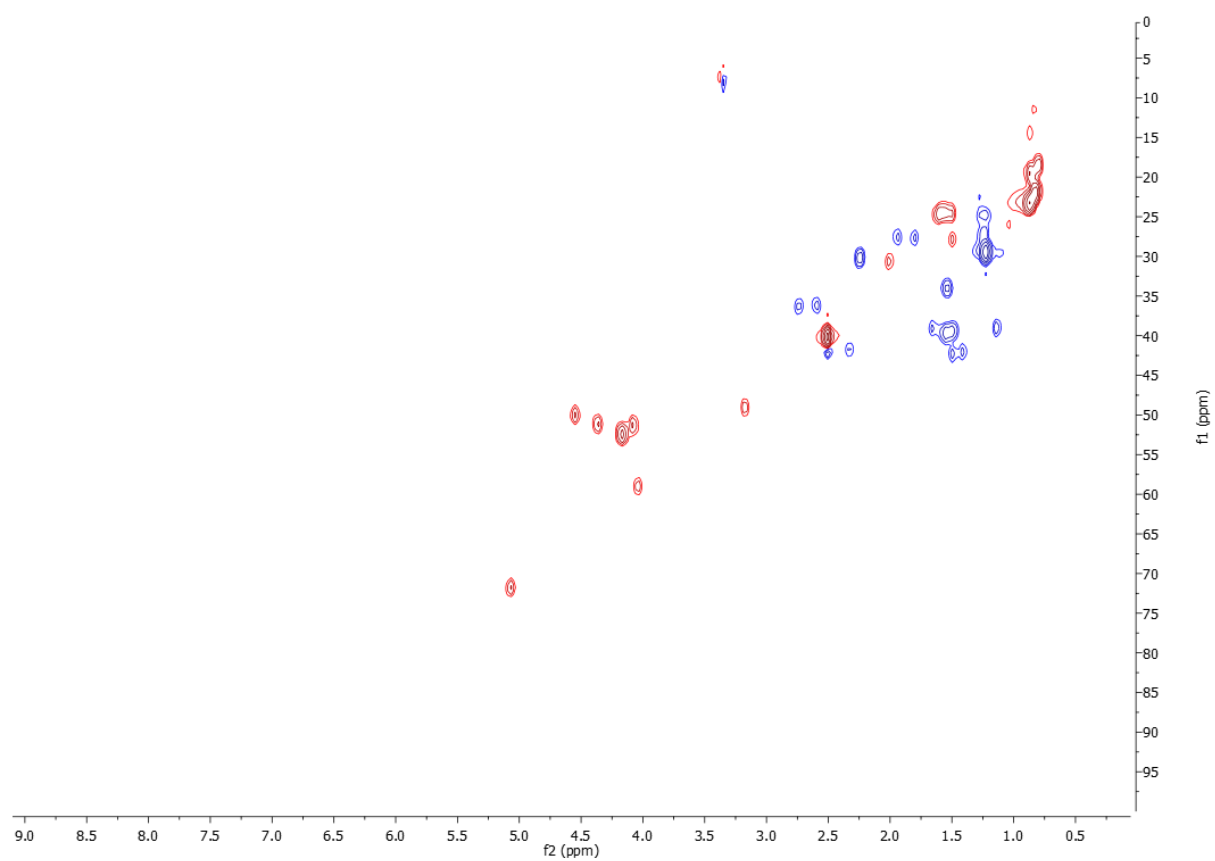

**Figure S10** HMBC spectrum of compound 2 in DMSO

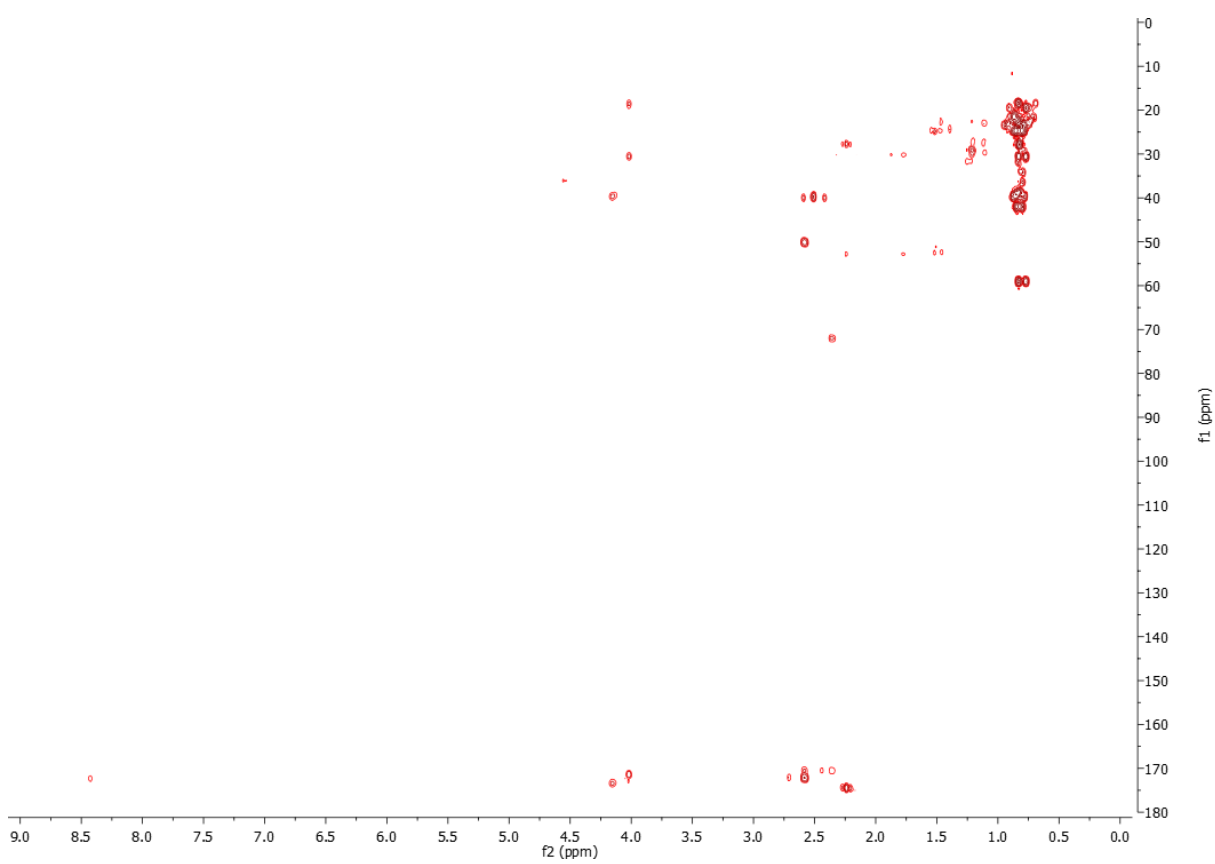

**Table S3** Experimental NMR data of compound 3 in DMSO -  $d_6$  at 25°C

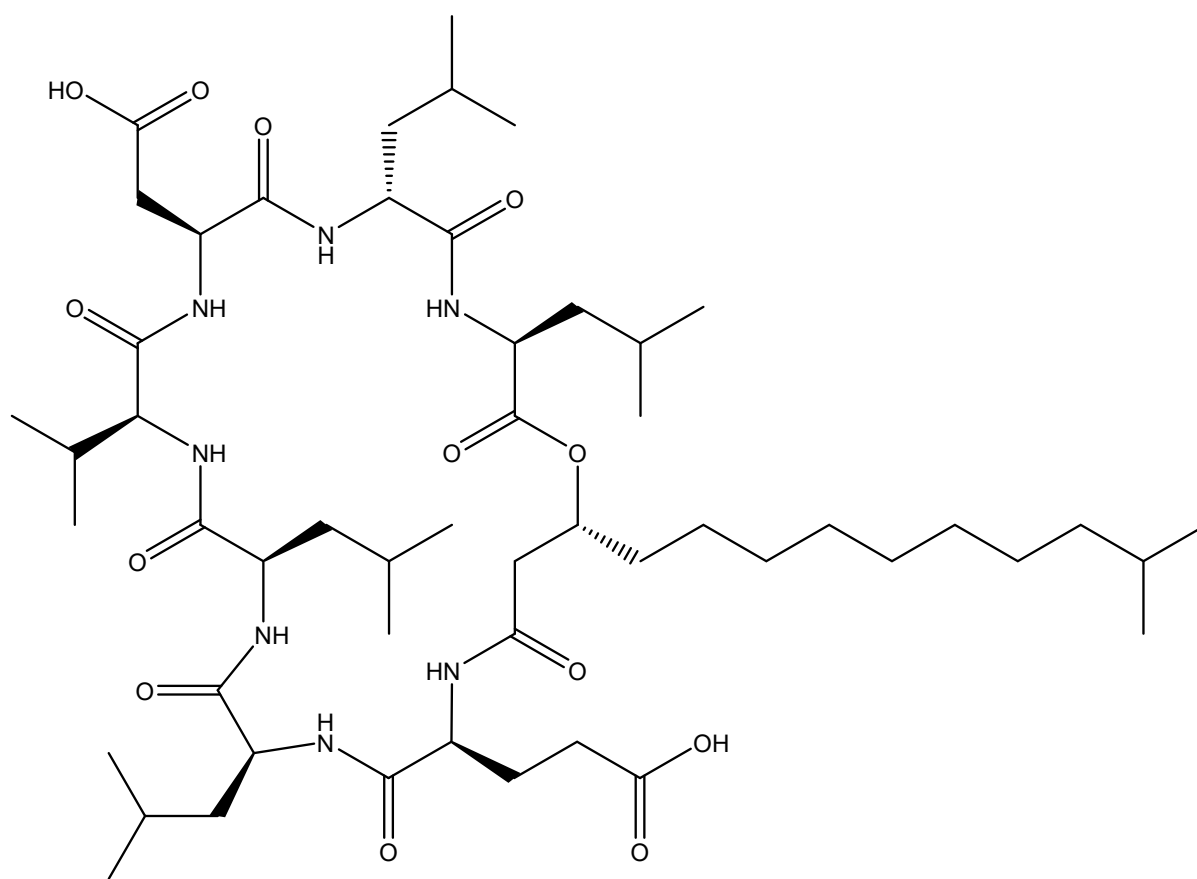

| Position |               | $\delta_c$ | $\delta_H$ (J in Hz) |
|----------|---------------|------------|----------------------|
| Glu1     | NH            | -          | 8.42, (d), 6.6       |
|          | CO            | 172.2      | -                    |
|          | $\alpha$ -C   | 51.1       | 4.04, (q), 4.8       |
|          | $\beta$ -C    | 39.5       | 1.63, (m)            |
|          | $\gamma$ -C   | 39.3       | 1.63, (dd), 4.8/12.8 |
|          | COOH          | 172.3      | 12.0                 |
|          |               |            |                      |
| Leu2     | NH            | -          | 8.14, d, 7.2         |
|          | CO            | 173.6      | -                    |
|          | $\alpha$ -C   | 52.3       | 4.16, (m)            |
|          | $\beta$ -C    | 24.5       | 1.47, (m)            |
|          | $\gamma$ -C   | 39.8       | 1.50, (m)            |
|          | $\delta_1$ -C | 23.7       | 0.87, (m)            |
|          | $\delta_2$ -C | 23.4       | 0.86, (m)            |
| Leu3     | NH            | -          | 7.60, (s)            |
|          | CO            | 157.5      | -                    |
|          | $\alpha$ -C   | 51.4       | 4.35, (q), 5.6       |
|          | $\beta$ -C    | 24.7       | 1.52, (m)            |
|          | $\gamma$ -C   | 39.0       | 1.26, (m)            |
|          | $\delta_1$ -C | 23.8       | 0.86, (m)            |
|          | $\delta_2$ -C | 22.9       | 0.82, (m)            |
| Val4     | NH            | -          | 8.00, (s)            |
|          | CO            | -          | -                    |
|          | $\alpha$ -C   | 51.2       | 4.04, (t), 7.6       |
|          | $\beta$ -C    | 30.3       | 2.02, (m)            |

|                    |               |       |           |
|--------------------|---------------|-------|-----------|
| Asp5               | $\gamma_1$ -C | 22.9  | 0.90, (m) |
|                    | $\gamma_2$ -C | 22.6  | 0.76, (m) |
|                    | NH            | -     | 8.16, (s) |
|                    | CO            | -     | -         |
|                    | $\alpha$ -C   | 49.9  | 4.54, (m) |
|                    | $\beta$ -C    | 35.9  | 2.60, (m) |
| Leu6               | COOH          | -     | 12.33 (s) |
|                    | NH            | -     | 7.60, (s) |
|                    | CO            | -     | -         |
|                    | $\alpha$ -C   | 51.6  | 4.36, (m) |
|                    | $\beta$ -C    | 40.3  | 1.46, (m) |
|                    | $\gamma$ -C   | 23.4  | 1.14, (m) |
| Leu7               | $\delta_1$ -C | 23.1  | 0.89, (m) |
|                    | $\delta_2$ -C | 22.3  | 0.88, (m) |
|                    | NH            | -     | 7.88, (s) |
|                    | CO            | -     | -         |
|                    | $\alpha$ -C   | 52.3  | 4.16, (m) |
|                    | $\beta$ -C    | 30.1  | 1.25, (m) |
| Fatty<br>acid part | $\gamma$ -C   | 41.6  | 1.56, (m) |
|                    | $\delta_1$ -C | 23.1  | 0.83, (m) |
|                    | $\delta_2$ -C | 22.7  | 0.80, (m) |
|                    | C1            | 171.4 | -         |
|                    | C2            | 41.7  | 2.34, (m) |
|                    | C3            | 71.6  | 5.06, (m) |
|                    | C4            | 33.7  | 1.51, (m) |
|                    | C5-15         | 22.3  | 0.80, (m) |
|                    | C16           | 29.7  | 2.03, (m) |
|                    | C17           | 22.1  | 0.80, (m) |
|                    | C18           | 24.3  | 0.81, (m) |

**Figure S11** (+)-LRESIMS spectrum of compound 3

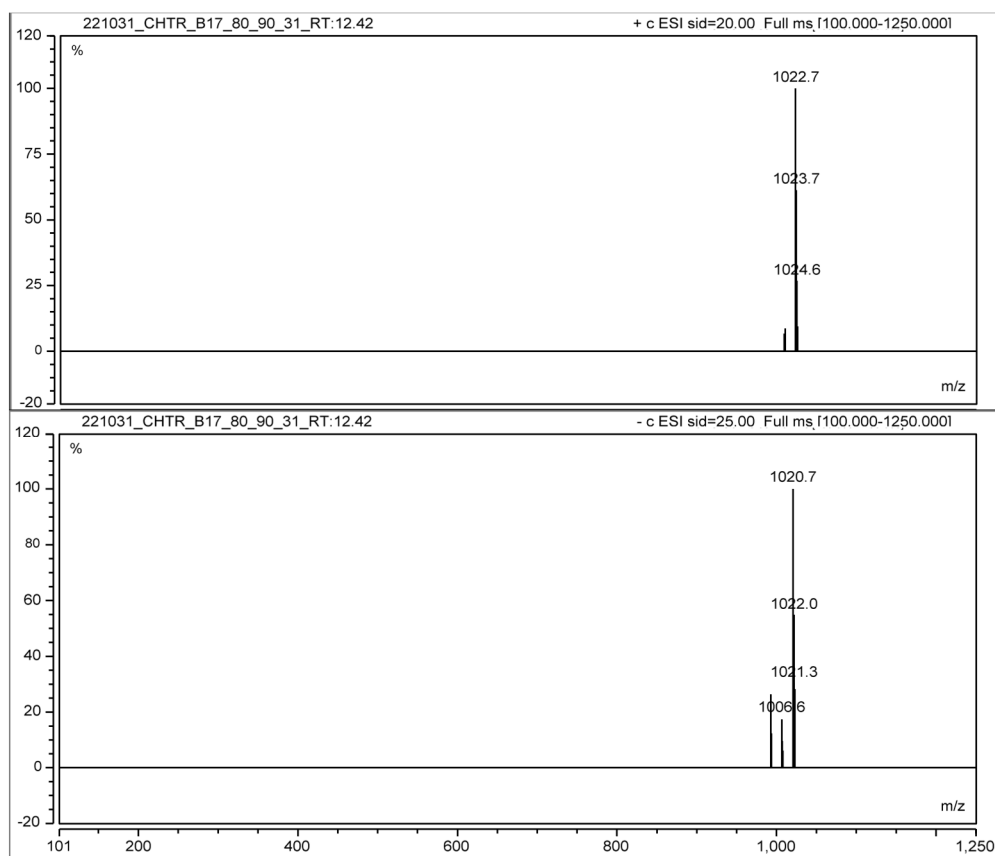

**Figure S12**  $^1\text{H}$  NMR (800 MHz, DMSO) spectrum of compound 3

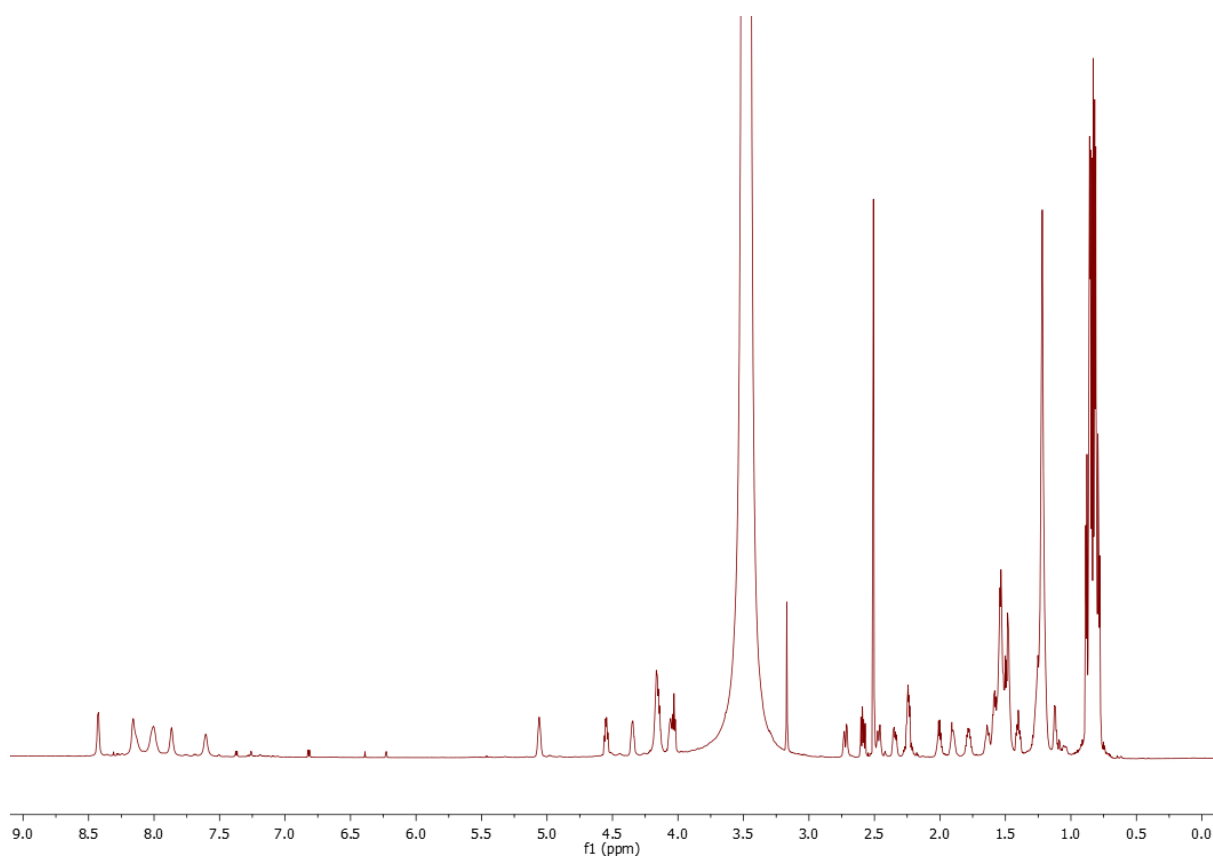

**Figure S13**  $^1\text{H}$ - $^1\text{H}$  COSY spectrum of compound 3 in DMSO

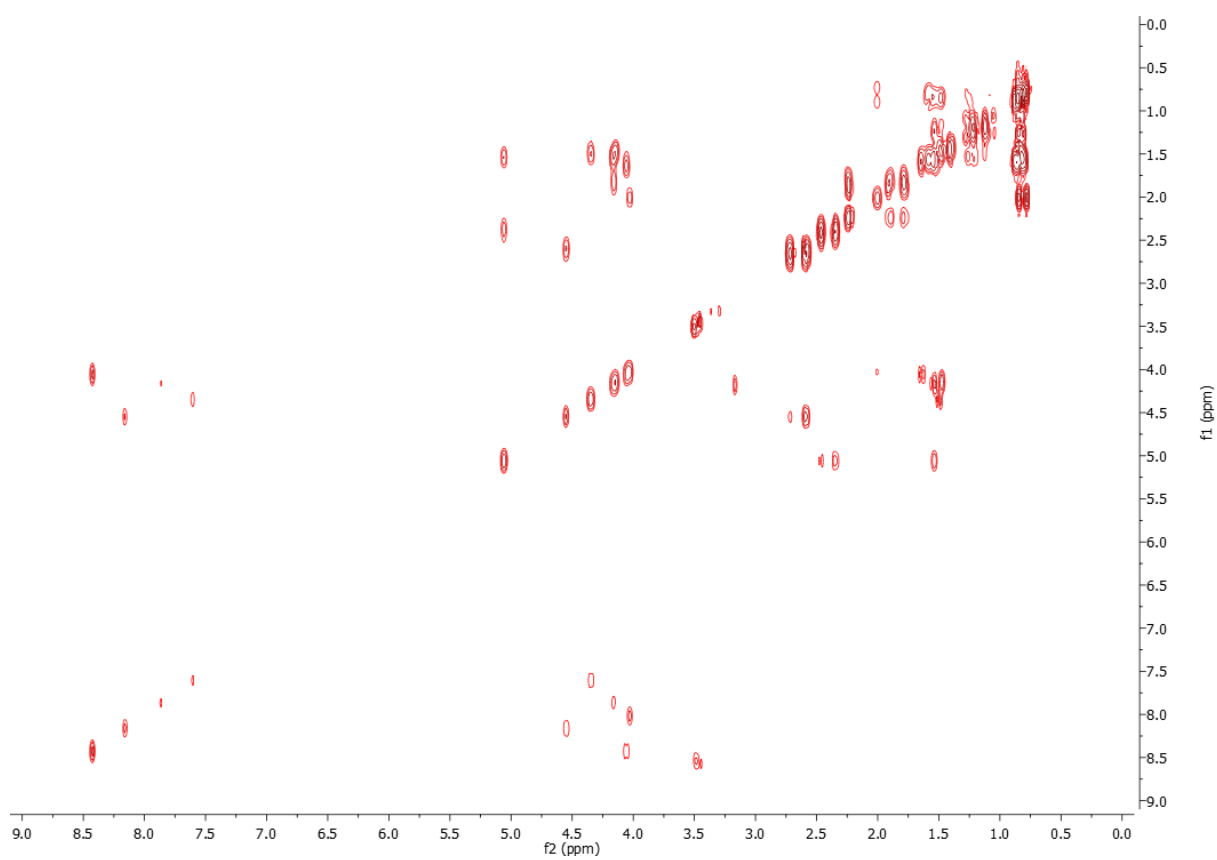

**Figure S14** HSQC spectrum of compound 3 in DMSO



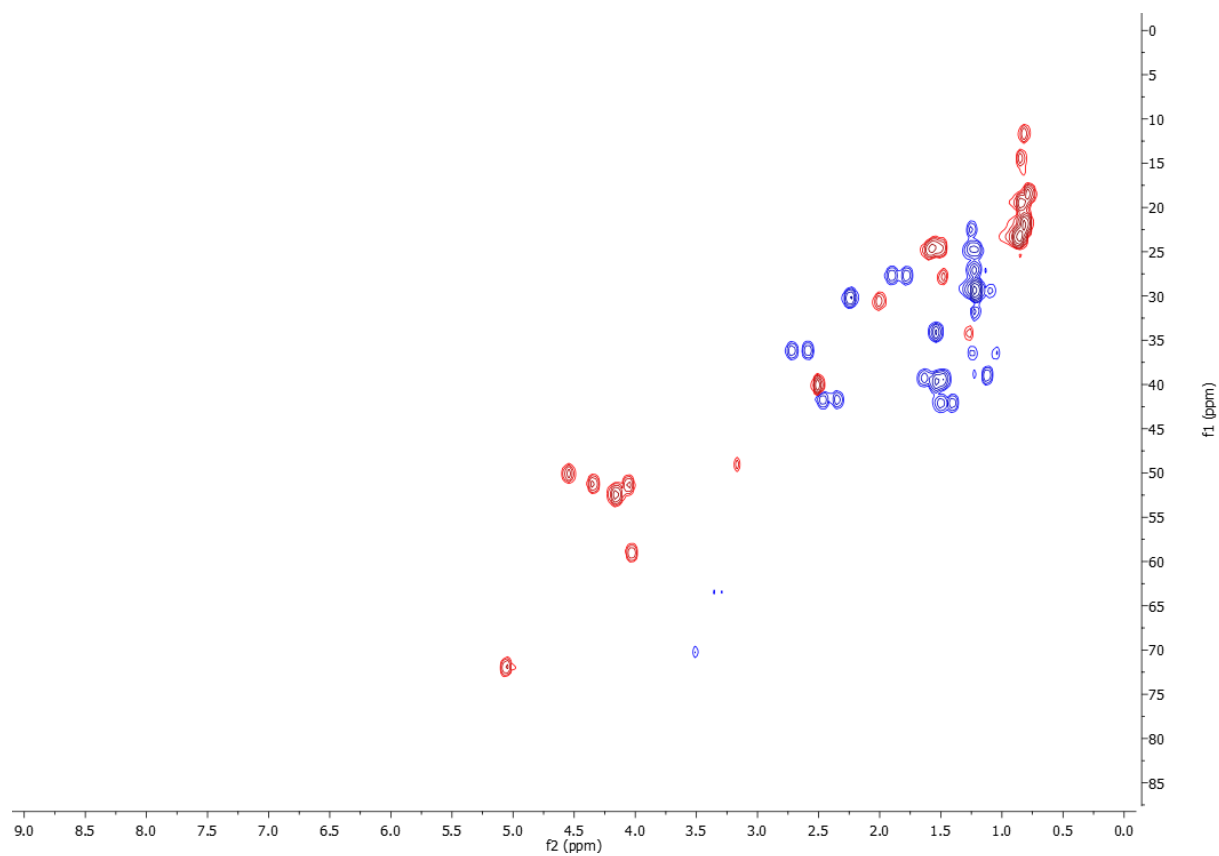

**Figure S15** HMBC spectrum of compound 3 in DMSO

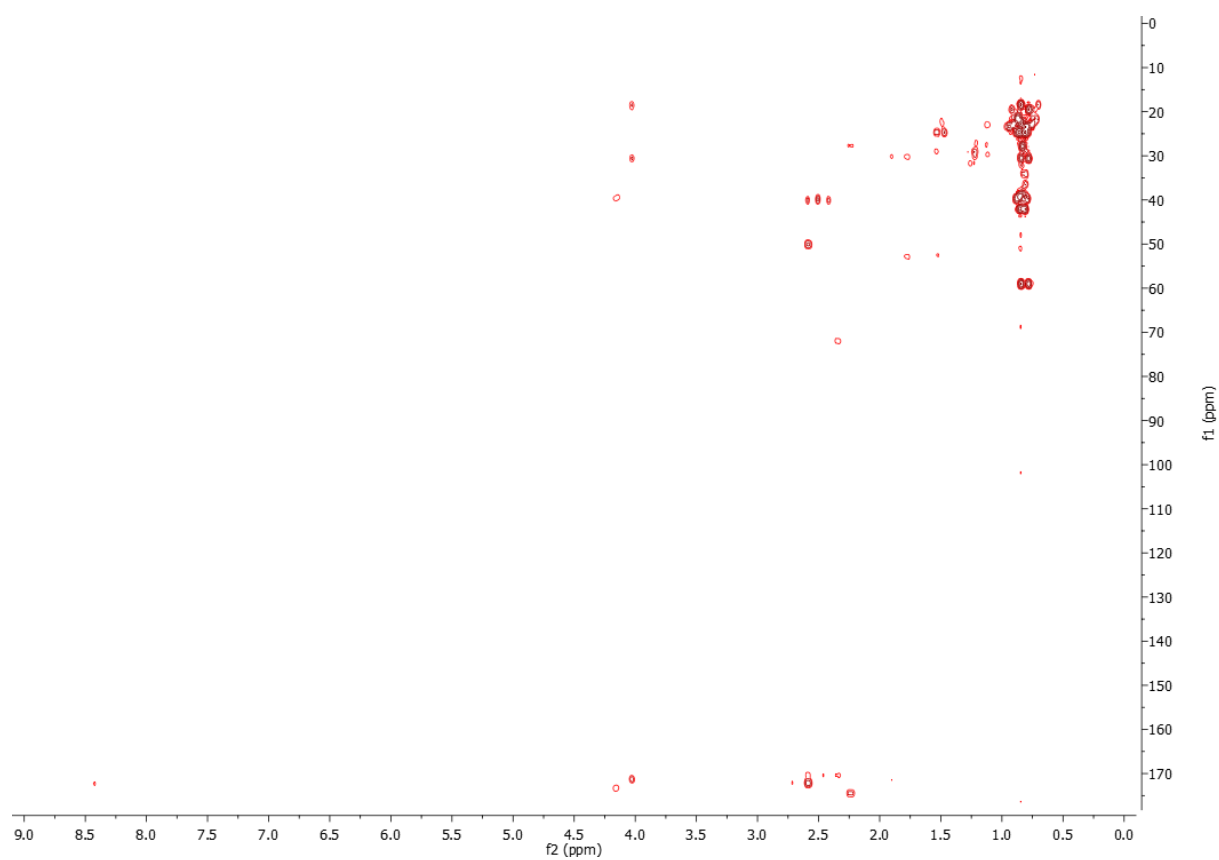

**Table S4** Experimental NMR data of compound 4 in DMSO -  $d_6$  at 25°C

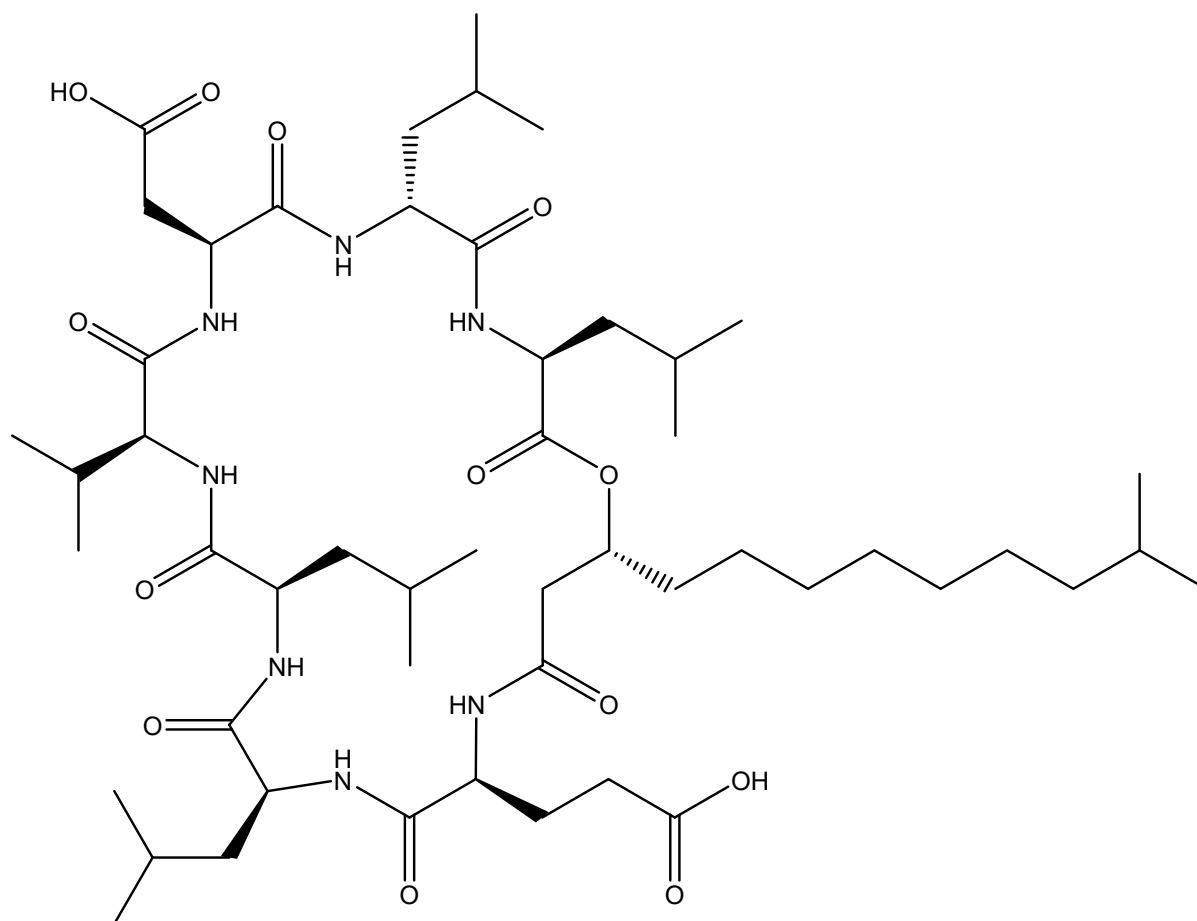

| Position |               | $\delta_c$ | $\delta_H$ (J in Hz) |
|----------|---------------|------------|----------------------|
| Glu1     | NH            | -          | 8.44, (d), 6.6       |
|          | CO            | 172.2      | -                    |
|          | $\alpha$ -C   | 51.1       | 4.04, (q), 4.8       |
|          | $\beta$ -C    | 39.5       | 1.63, (m)            |
|          | $\gamma$ -C   | 39.3       | 1.63, (dd), 4.8      |
|          | COOH          |            | 12.0                 |
| Leu2     | NH            | -          | 8.13, (d), 7.2       |
|          | CO            | 173.6      | -                    |
|          | $\alpha$ -C   | 52.3       | 4.16, (m)            |
|          | $\beta$ -C    | 24.5       | 1.47, (m)            |
|          | $\gamma$ -C   | 39.8       | 1.50, (m)            |
|          | $\delta_1$ -C | 23.7       | 0.87, (m)            |
| Leu3     | $\delta_2$ -C | 23.4       | 0.86, (m)            |
|          | NH            | -          | 7.61, (s)            |
|          | CO            | 157.5      | -                    |
|          | $\alpha$ -C   | 51.4       | 4.35, (q), 5.6       |
|          | $\beta$ -C    | 24.7       | 1.53, (m)            |
|          | $\gamma$ -C   | 39.0       | 1.21, (m)            |
|          | $\delta_1$ -C | 23.8       | 0.86, (m)            |
|          | $\delta_2$ -C | 22.9       | 0.82, (m)            |

|                 |               |       |                |
|-----------------|---------------|-------|----------------|
| Val4            | NH            | -     | 8.00, (s)      |
|                 | CO            | -     | -              |
|                 | $\alpha$ -C   | 51.2  | 4.04, (t), 7.6 |
|                 | $\beta$ -C    | 30.3  | 2.00, (m)      |
|                 | $\gamma_1$ -C | 22.9  | 0.90, (m)      |
|                 | $\gamma_2$ -C | 22.6  | 0.76, (m)      |
| Asp5            | NH            | -     | 8.17, (s)      |
|                 | CO            | -     | -              |
|                 | $\alpha$ -C   | 49.9  | 4.55, (m)      |
|                 | $\beta$ -C    | 35.9  | 2.60, (m)      |
|                 | COOH          | -     | 12.33, (s)     |
| Leu6            | NH            | -     | 7.61, (s)      |
|                 | CO            | -     | -              |
|                 | $\alpha$ -C   | 51.6  | 4.34, (m)      |
|                 | $\beta$ -C    | 40.3  | 1.47, (m)      |
|                 | $\gamma$ -C   | 23.4  | 1.13, (m)      |
|                 | $\delta_1$ -C | 23.1  | 0.89, (m)      |
|                 | $\delta_2$ -C | 22.3  | 0.88, (m)      |
| Leu7            | NH            | -     | 7.88, (s)      |
|                 | CO            | -     | -              |
|                 | $\alpha$ -C   | 52.3  | 4.16, (m)      |
|                 | $\beta$ -C    | 30.1  | 1.22, (m)      |
|                 | $\gamma$ -C   | 41.6  | 1.56, (m)      |
|                 | $\delta_1$ -C | 23.1  | 0.83, (m)      |
|                 | $\delta_2$ -C | 22.7  | 0.80, (m)      |
| Fatty acid part | C1            | 171.4 | -              |
|                 | C2            | 41.7  | 2.35, (m)      |
|                 | C3            | 71.6  | 5.06, (m)      |
|                 | C4            | 33.7  | 1.53, (m)      |
|                 | C5-15         | 22.3  | 0.80, (m)      |
|                 | C16           | 29.7  | 2.03, (m)      |
|                 | C17           | 22.1  | 0.80, (m)      |
|                 | C18           | 24.3  | 0.81, (m)      |

**Figure S16** (+)-LRESIMS spectrum of compound 4

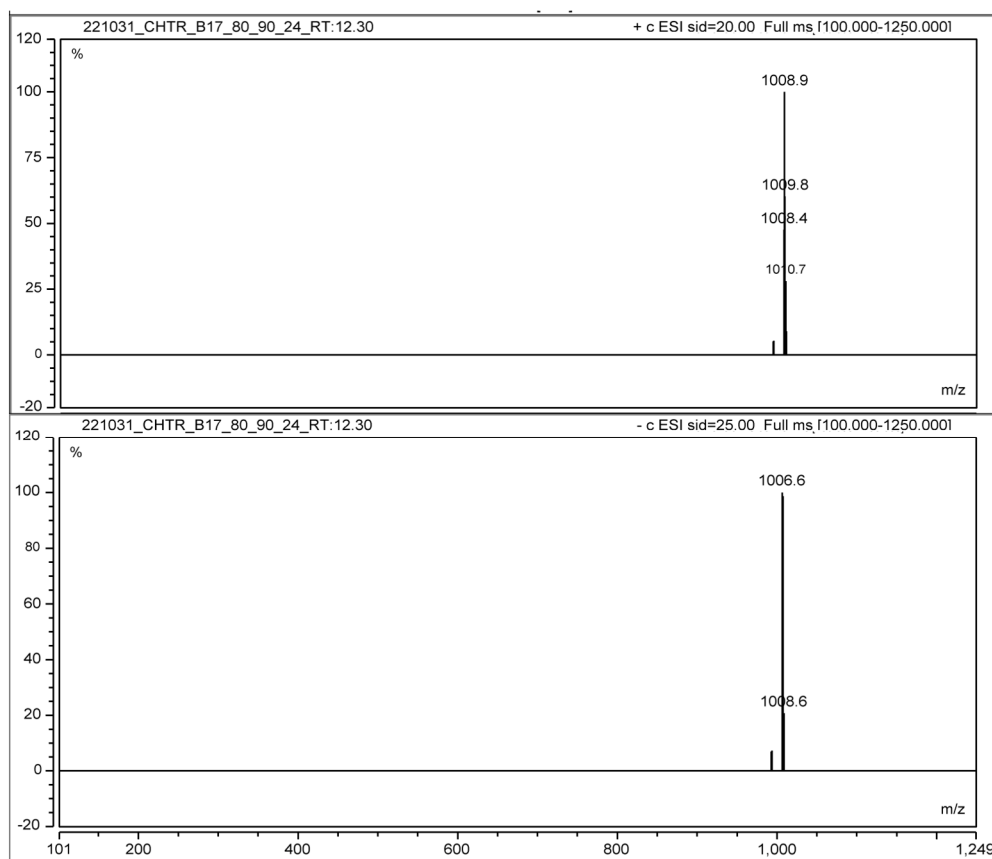

**Figure S17**  $^1\text{H}$  NMR (800 MHz, DMSO) spectrum of compound 4

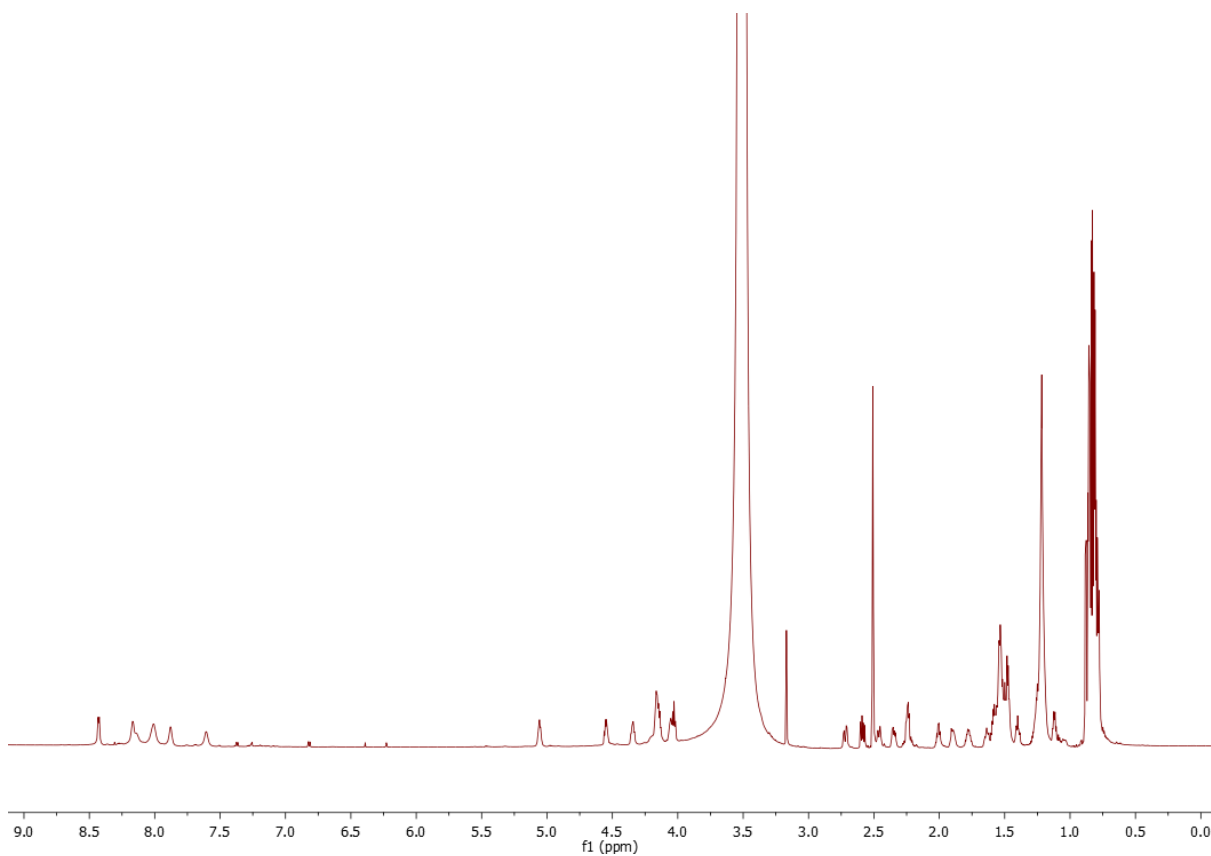

**Figure S18**  $^1\text{H}$  -  $^1\text{H}$  COSY spectrum of compound 4 in DMSO

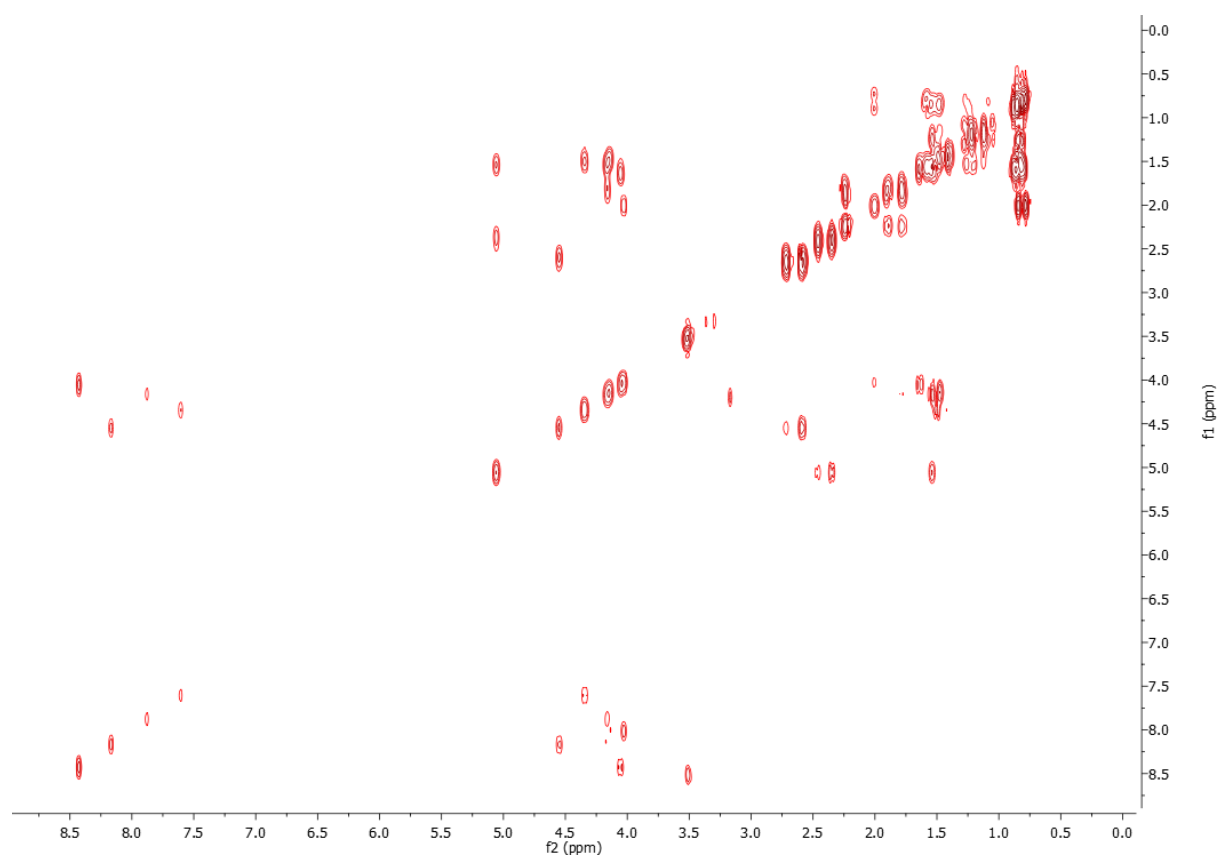

**Figure S19** HSQC spectrum of compound 4 in DMSO

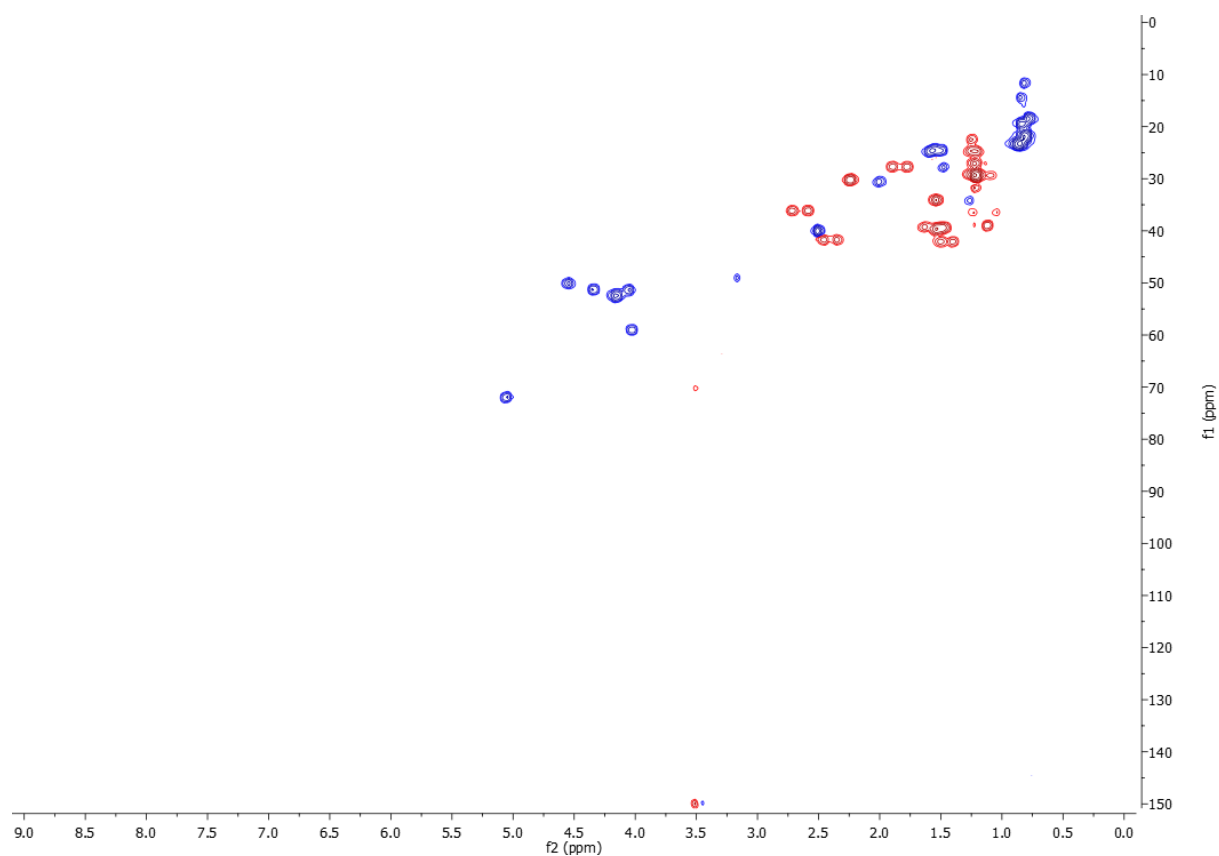

**Figure S20** HMBC spectrum of compound 4 in DMSO

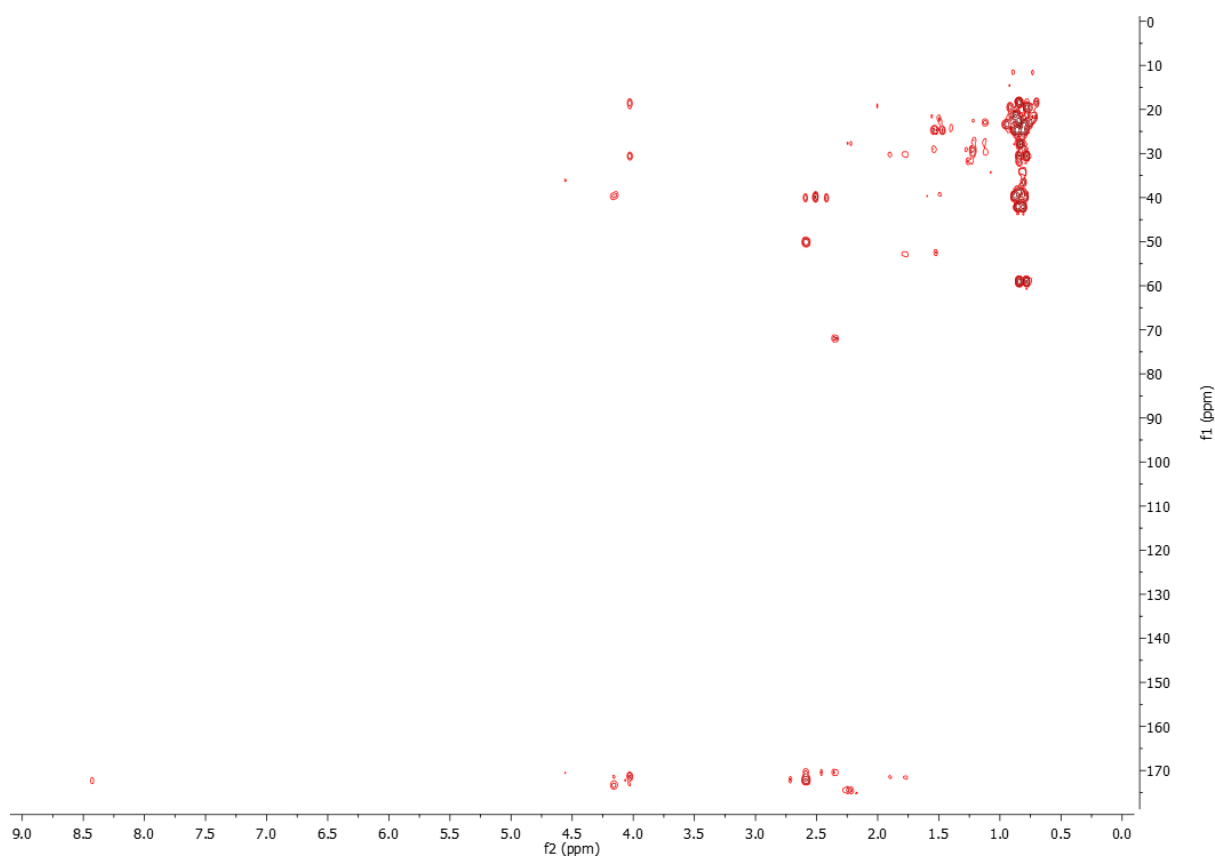

**Table S5** Experimental NMR data of compound 5 in DMSO -  $d_6$  at 25°C

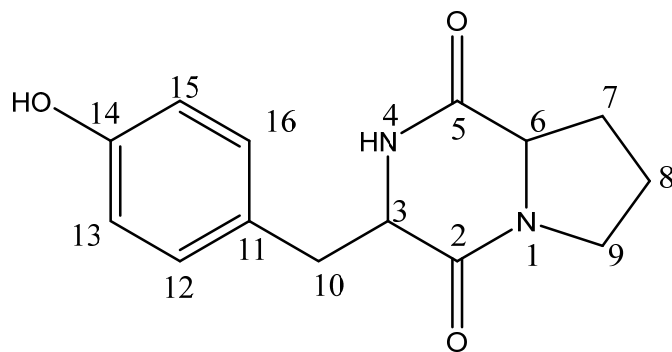

| Position | $\delta_C$ | C-type          | $\delta_H$ (J in Hz) |
|----------|------------|-----------------|----------------------|
| 1        | - (N)      | -               | -                    |
| 2        | 165.3      | CO              | -                    |
| 3        | 56.4       | CH              | 4.25                 |
| 4        | -          | NH              | 7.86                 |
| 5        | 169.8      | CO              | -                    |
| 6        | 59.0       | C               | 4.05                 |
| 7        | 45.0       | CH <sub>2</sub> | 3.43, 3.28           |
| 8        | 22.0       | CH <sub>2</sub> | 1.74                 |
| 9        | 28.3       | CH <sub>2</sub> | 2.01, 1.41           |
| 10       | 35.5 (C-1) | CH <sub>2</sub> | 2.93                 |
| 11       | 127.1      | C               | -                    |
| 12       | 131.9      | CH              | 7.06                 |
| 13       | 114.6      | CH              | 6.64                 |

|    |       |     |      |
|----|-------|-----|------|
| 14 | 155.6 | COH | 9.11 |
| 15 | 114.6 | CH  | 6.64 |
| 16 | 131.9 | CH  | 7.06 |

**Figure S21** (+)-LRESIMS spectrum of compound 5

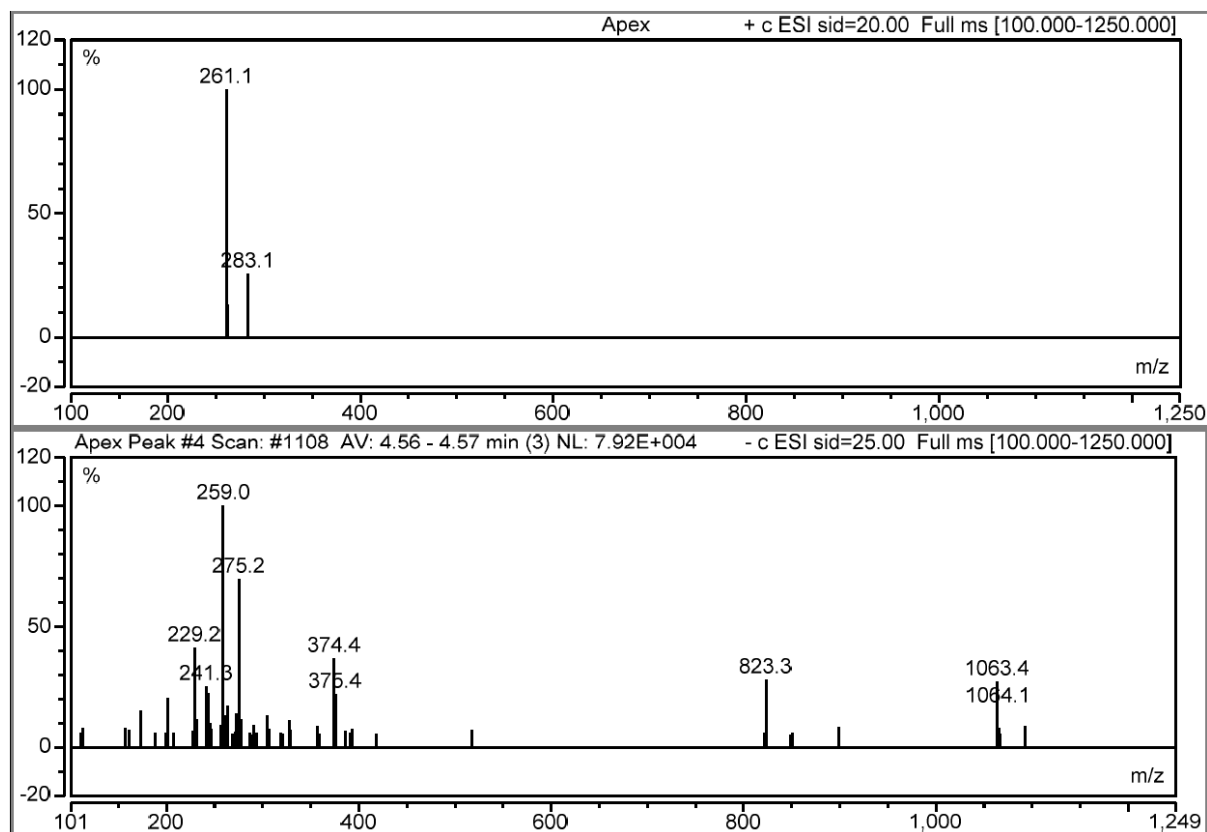

**Figure S22**  $^1\text{H}$  NMR (800 MHz, DMSO) spectrum of compound 5



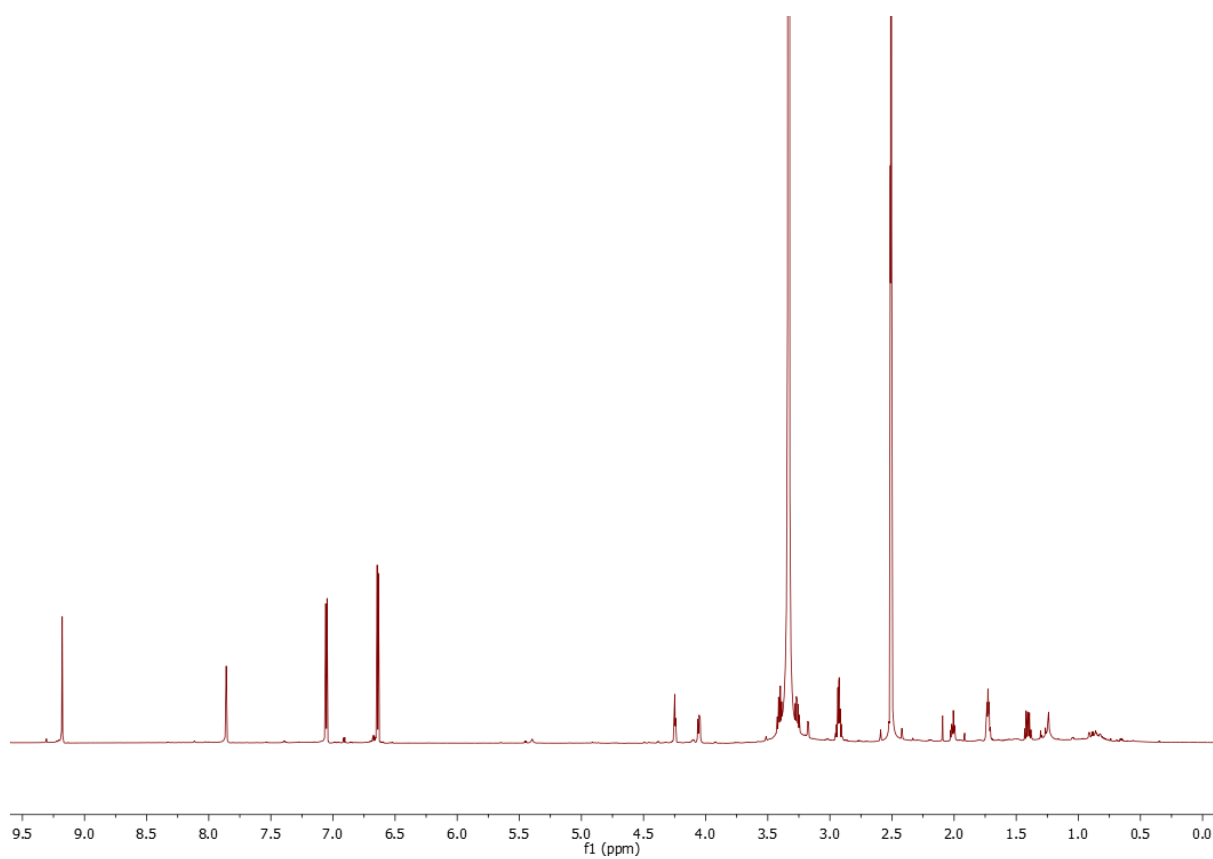

**Figure S23**  $^1\text{H}$ - $^1\text{H}$  COSY spectrum of compound 5 in DMSO

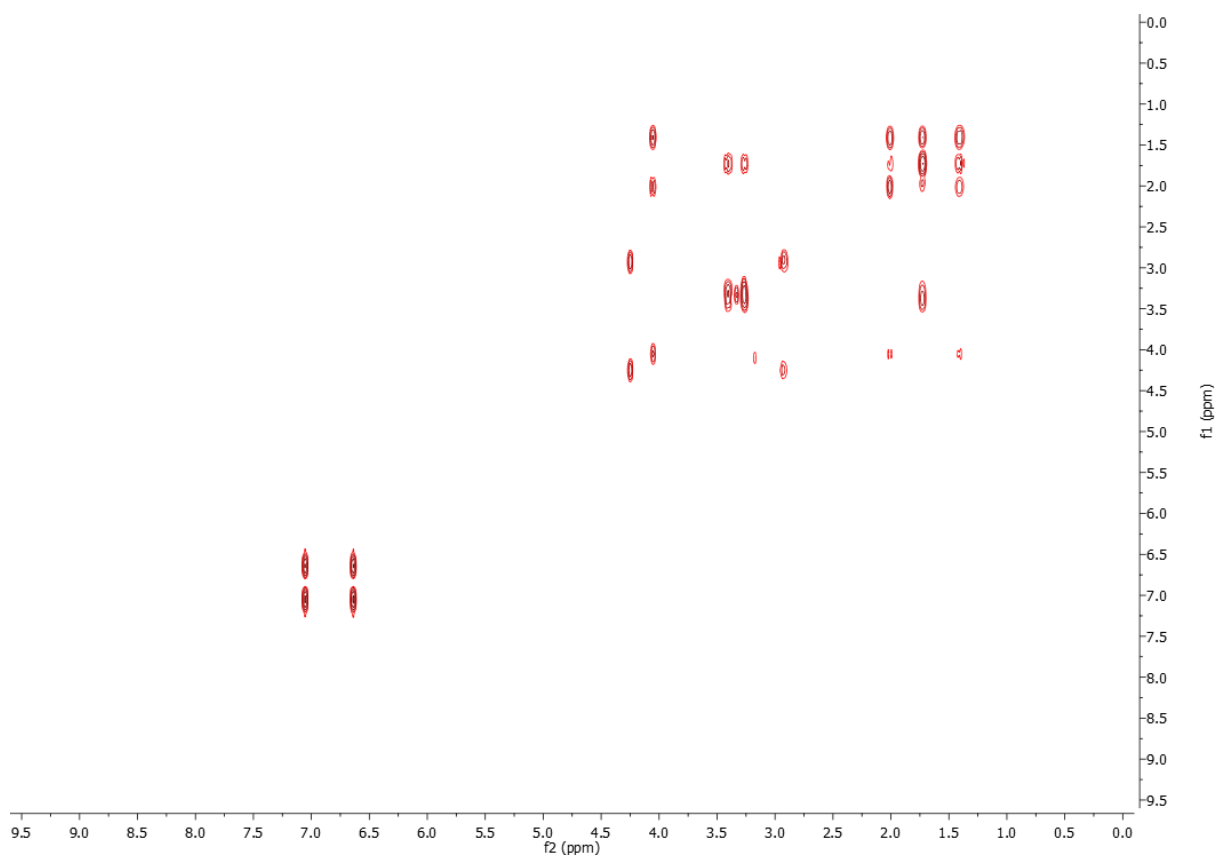

**Figure S24** HSQC spectrum of compound 5 in DMSO

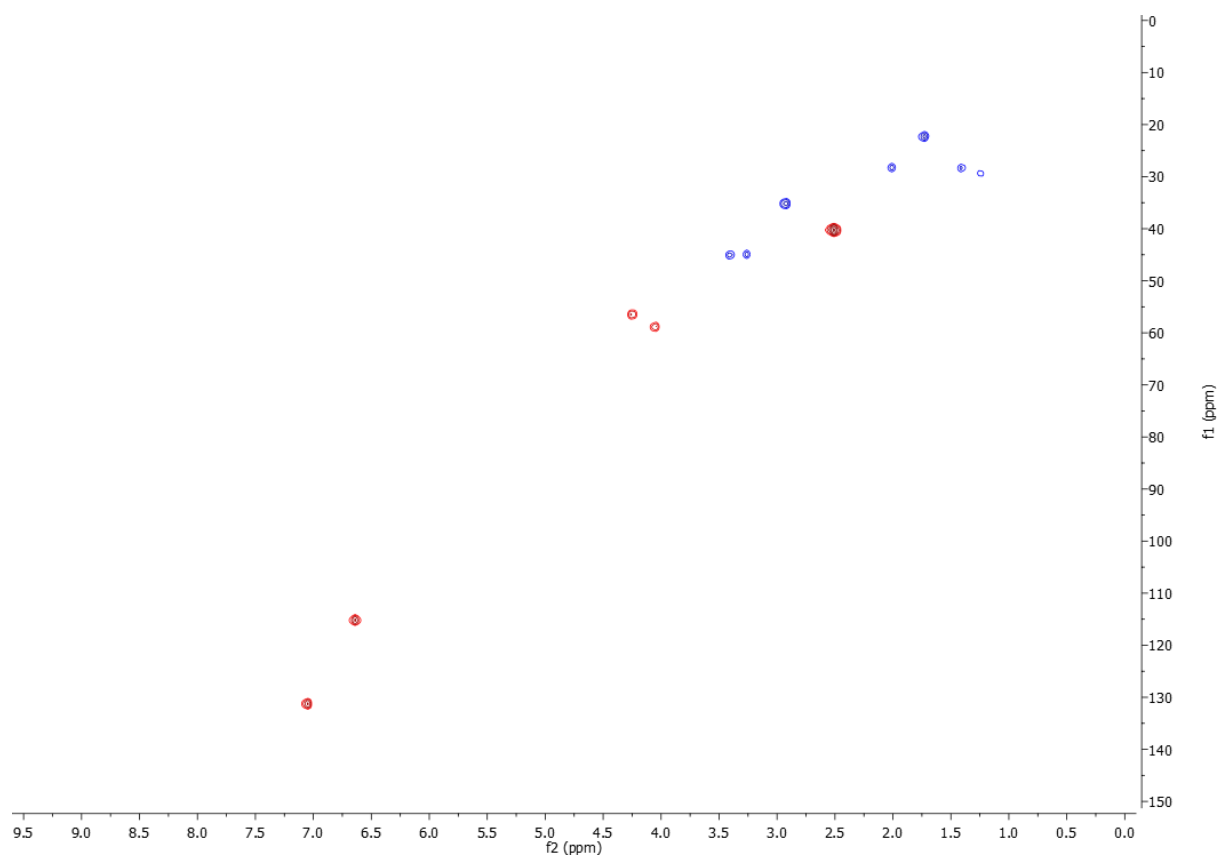

**Figure S25** HMBC spectrum of compound 5 in DMSO

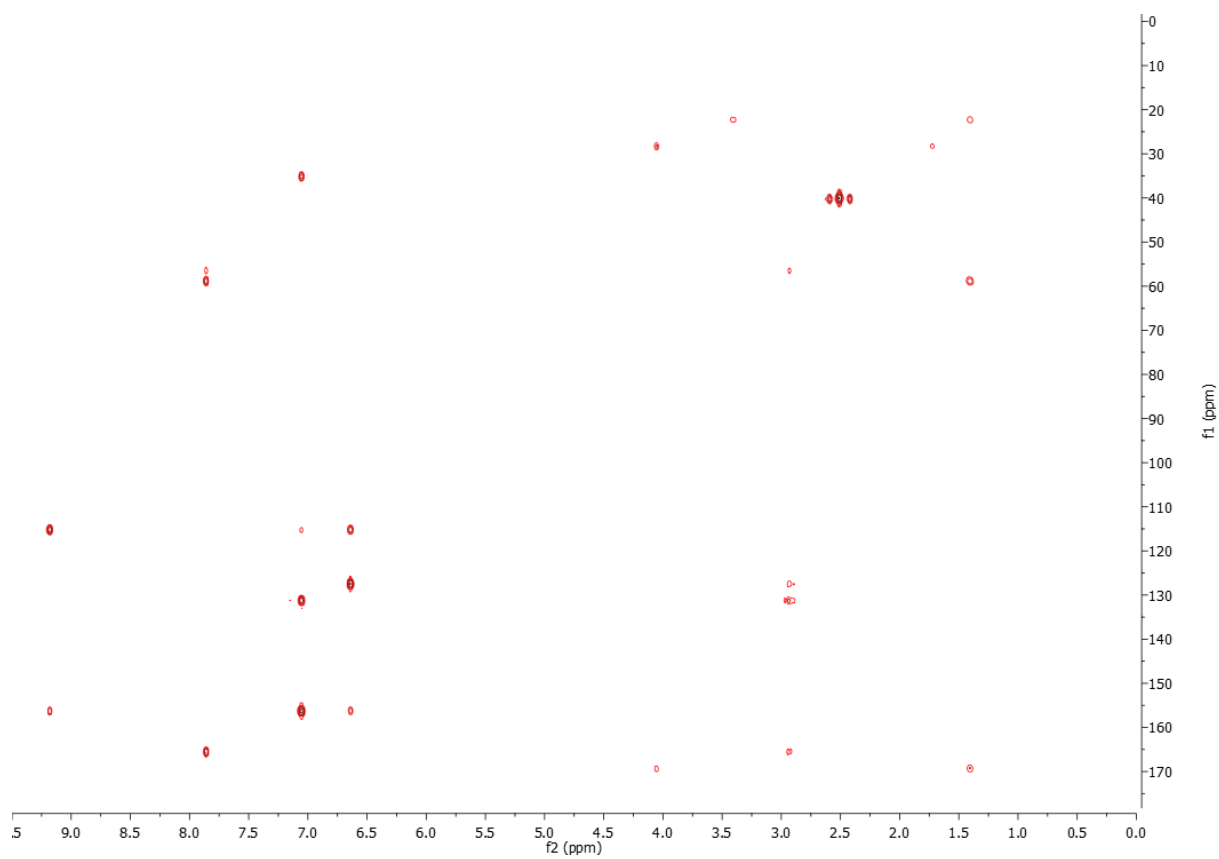

**Table S6** Experimental NMR data of compound 6 in DMSO -  $d_6$  at 25°C

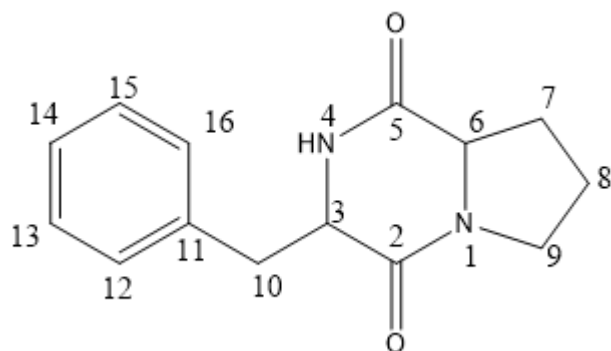

| Position | $\delta_c$  | C-type          | $\delta_H$ (J in Hz) |
|----------|-------------|-----------------|----------------------|
| 1        | - (N)       | -               | -                    |
| 2        | 169.3 (C-2) | C=O             | -                    |
| 3        | (C-3)       | CH              | 4.36                 |
| 4        | - (N)       | -               | 8.00                 |
| 5        | 165.6 (C)   | -               | -                    |
| 6        | 58.7 (C)    | CH              | 4.05                 |
| 7        | 28.9        | CH <sub>2</sub> | 2.01, 1.45           |
| 8        | 22.6        | CH <sub>2</sub> | 1.72                 |
| 9        | 44.3        | CH <sub>2</sub> | 3.37, 3.25           |
| 10       | 36.7        | CH <sub>2</sub> | 3.06                 |
| 11       | 138.0       | C               | -                    |
| 12       | 130.0       | CH              | 7.28, s              |
| 13       | 128.0       | CH              | 7.20, s              |
| 14       | 128.0       | CH              | 7.20, s              |
| 15       | 128.0       | CH              | 7.20, s              |
| 16       | 130.0       | CH              | 7.20, s              |

**Figure S26** (+)-LRESIMS spectrum of compound 6

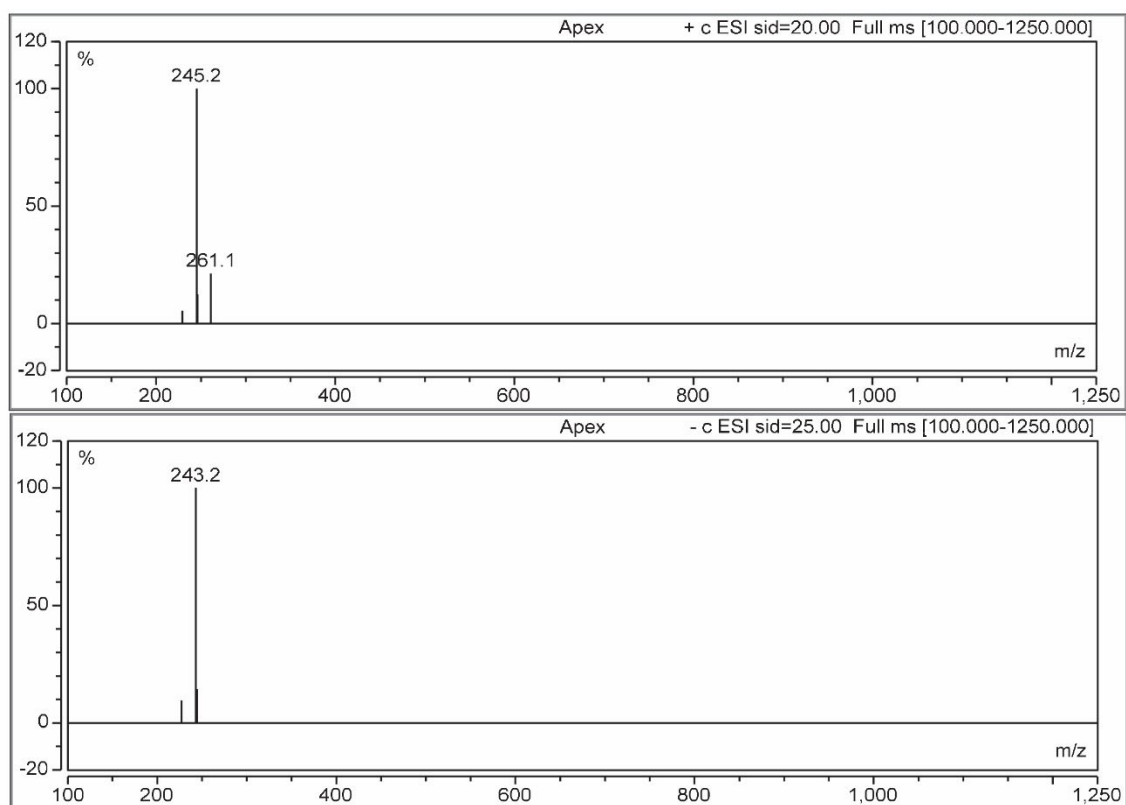

**Figure S27**  $^1\text{H}$  NMR (800 MHz, DMSO) spectrum of compound 6

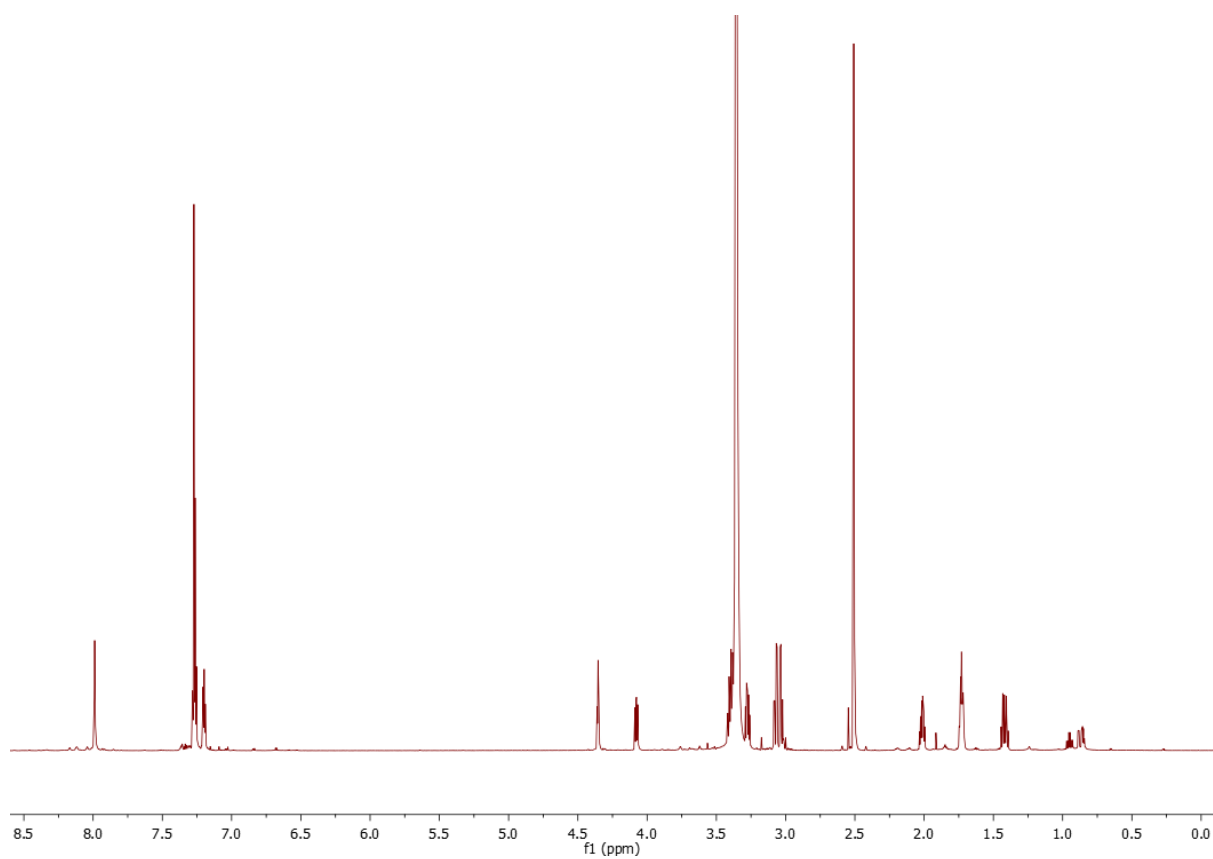

**Figure S28**  $^1\text{H}$ - $^1\text{H}$  COSY spectrum of compound 6 in DMSO

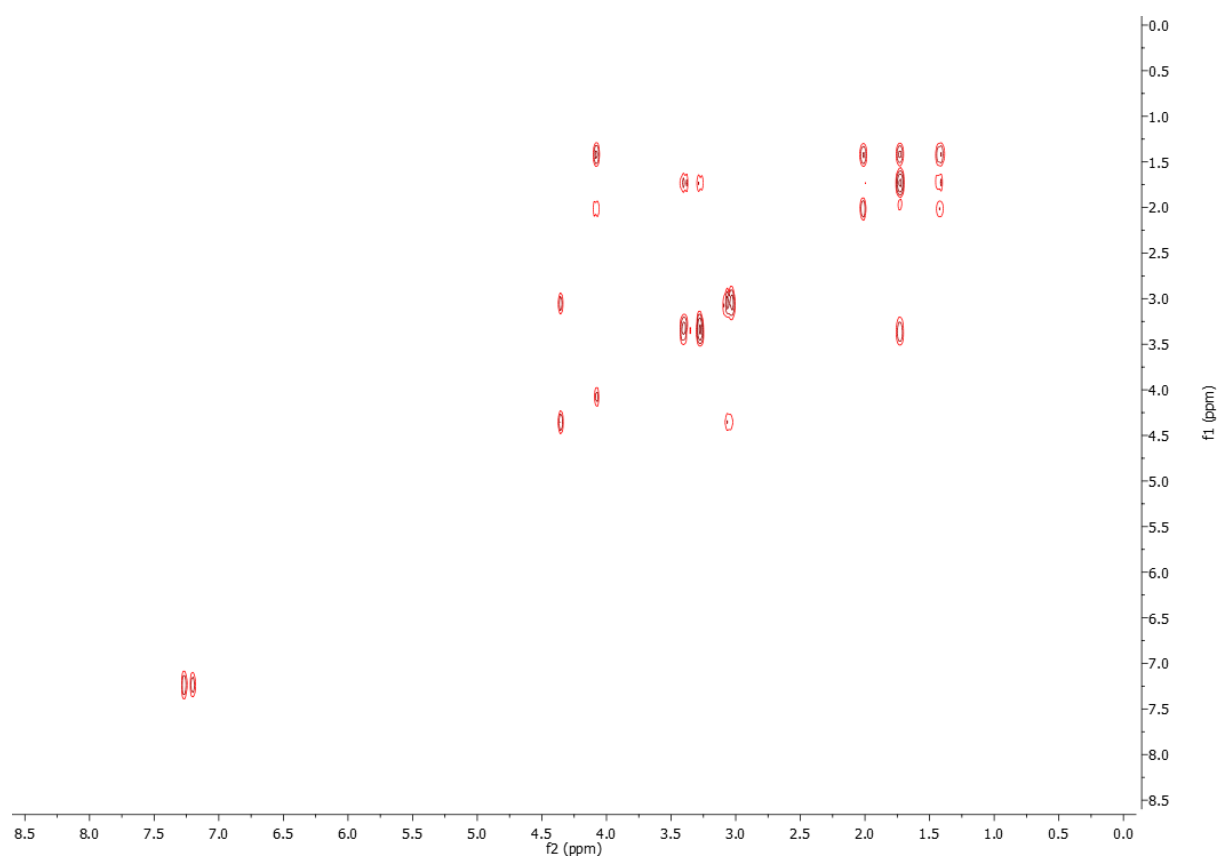

**Figure S29** HSQC spectrum of compound 6 in DMSO

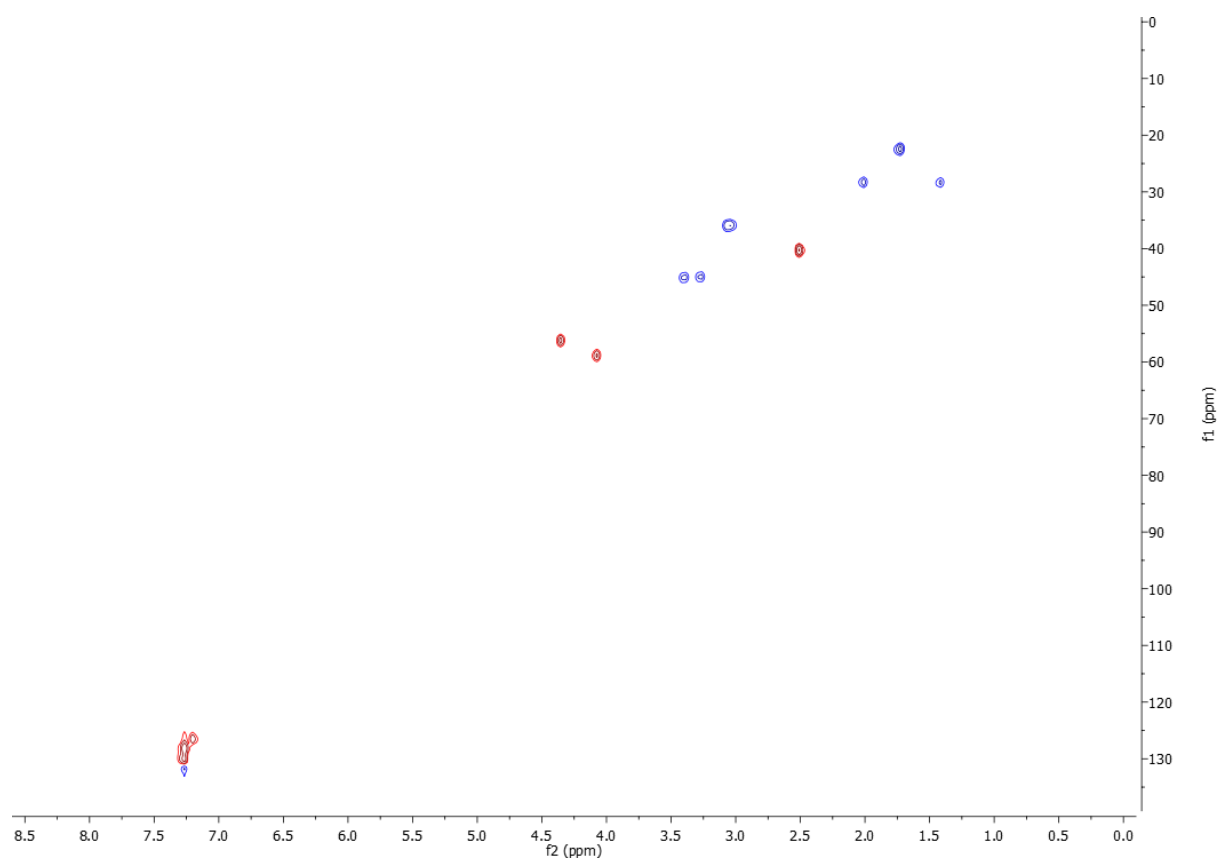

**Figure S30** HMBC spectrum of compound 6 in DMSO

0

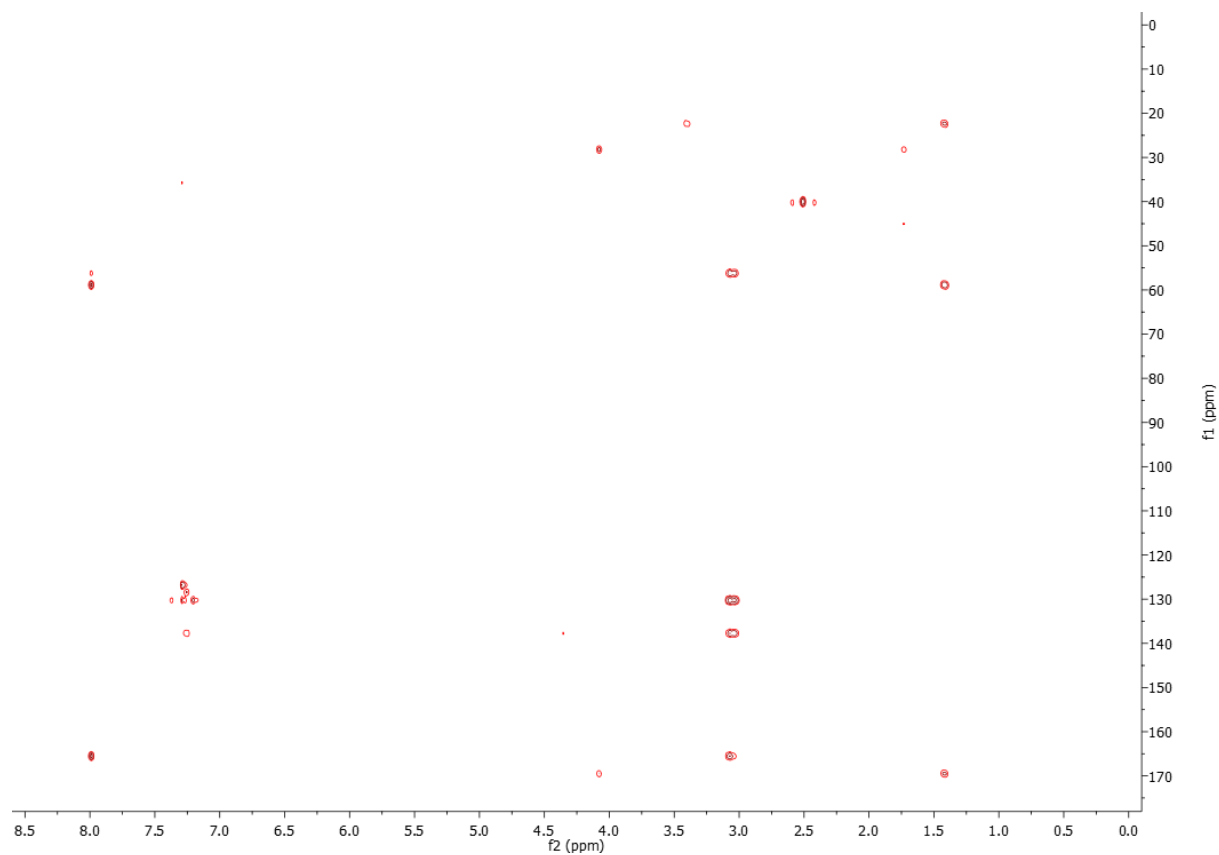

**Table S7** Experimental NMR data of compound 7 in DMSO -  $d_6$  at 25°C

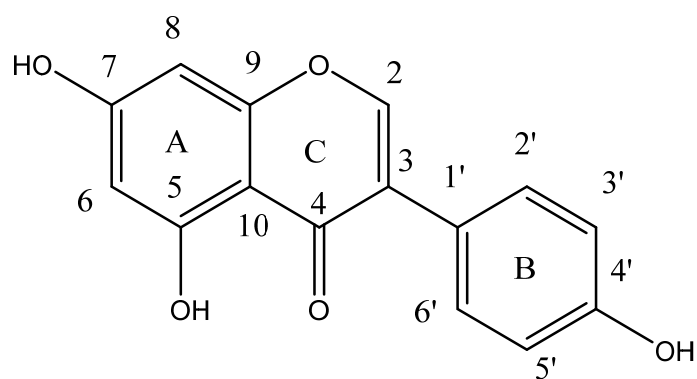

| Part<br>(ring) | Position | $\delta_C$ | $\delta_H$ (J in Hz) |
|----------------|----------|------------|----------------------|
| C              | 2        | 154.8      | 8.32, s              |
| C              | 3        | 121.3      | -                    |
| C              | 4        | 180.1      | -                    |
| A              | 5        | 162.6      | 12.99, s             |
| A              | 6        | 99.9       | 6.25,<br>d, 1.8J)    |
| A              | 7        | 164.8      | 11.01                |
| A              | 8        | 94.2       | 6.35,                |

|      |       |       |                 |
|------|-------|-------|-----------------|
|      |       |       | <i>d</i> , 1.8J |
| A, C | 9     | 158.0 | -               |
| A, C | 10    | 105.4 | -               |
| B    | 1'    | 122.0 | -               |
| B    |       |       | 7.37,           |
|      | 2'    | 129.9 | (doublet)       |
| B    |       |       | 6.82,           |
|      | 3'    | 114.9 | (doublet)       |
| B    | 4'    | 157.0 |                 |
| B    |       |       | 6.82,           |
|      | 5'    | 114.9 | (doublet)       |
| B    |       |       | 7.37,           |
|      | 6'    | 129.9 | (doublet)       |
|      | 7-OH  | -     | 11.01, s        |
|      | 5-OH  | -     | 12.99, s        |
|      | 4'-OH |       | 9.68, s         |

**Figure S31** (+)-LRESIMS spectrum of compound 7

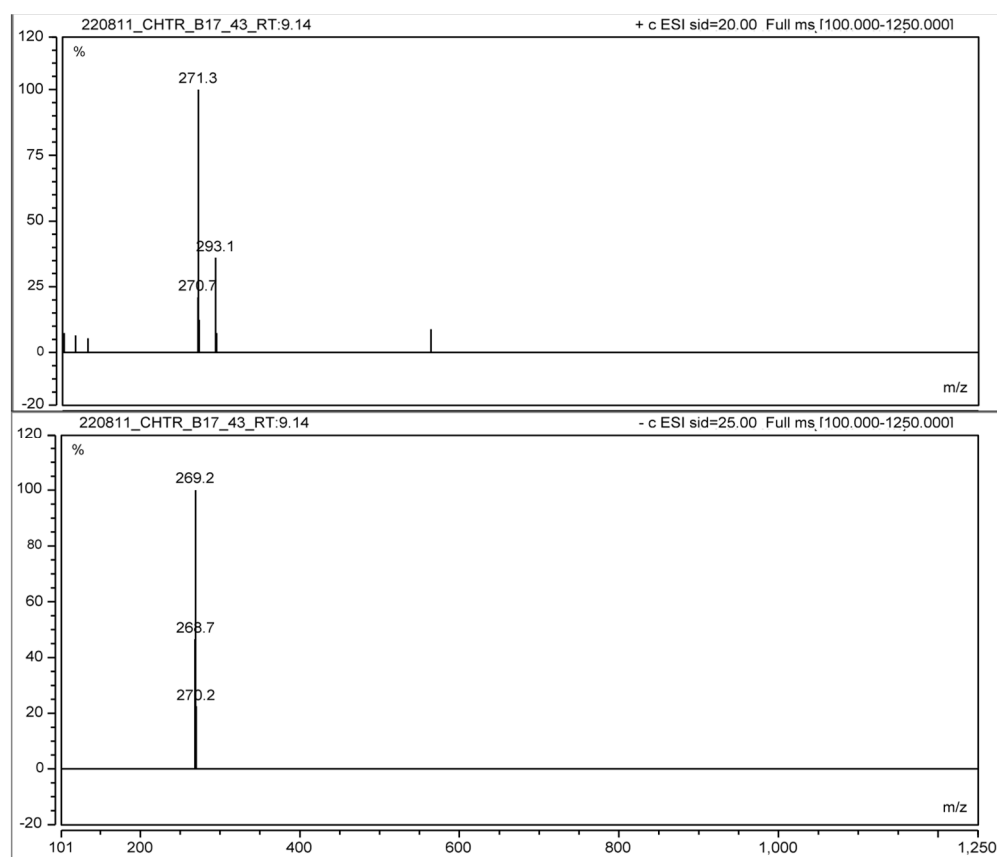

**Figure S32** <sup>1</sup>H NMR (800 MHz, DMSO) spectrum of compound 7

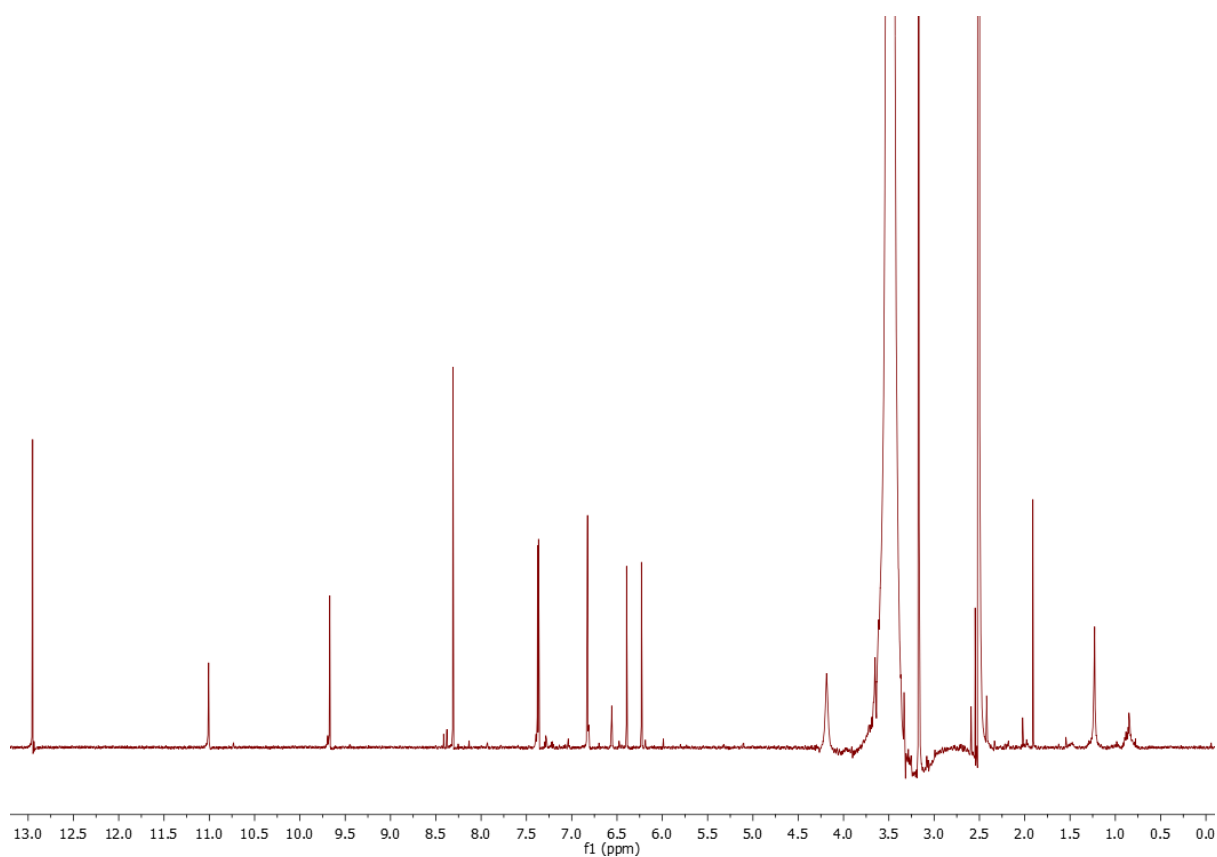

**Figure S33**  $^1\text{H}$ - $^1\text{H}$  COSY spectrum of compound 7 in DMSO

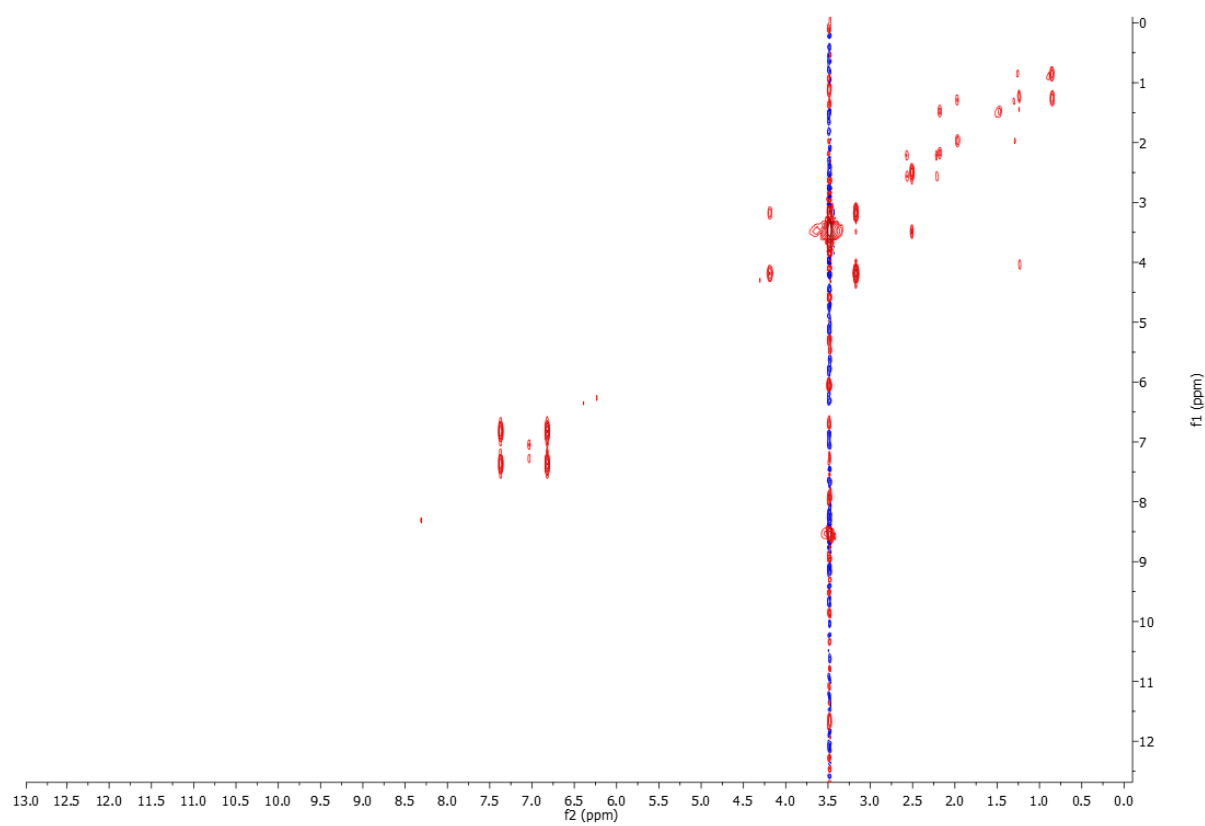

**Figure S34** HSQC spectrum of compound 7 in DMSO



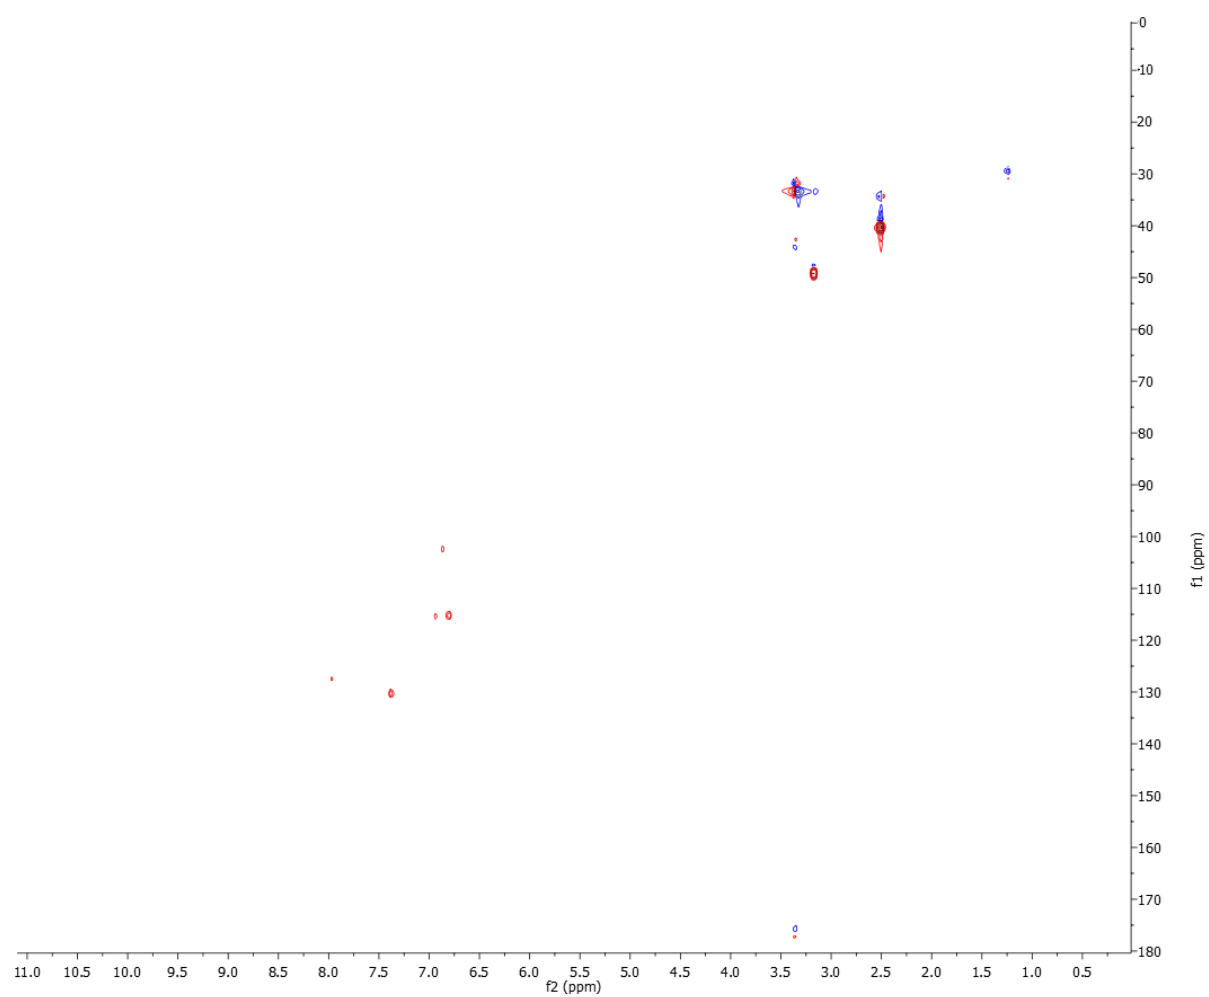

**Figure S35** HMBC spectrum of compound 7 in DMSO

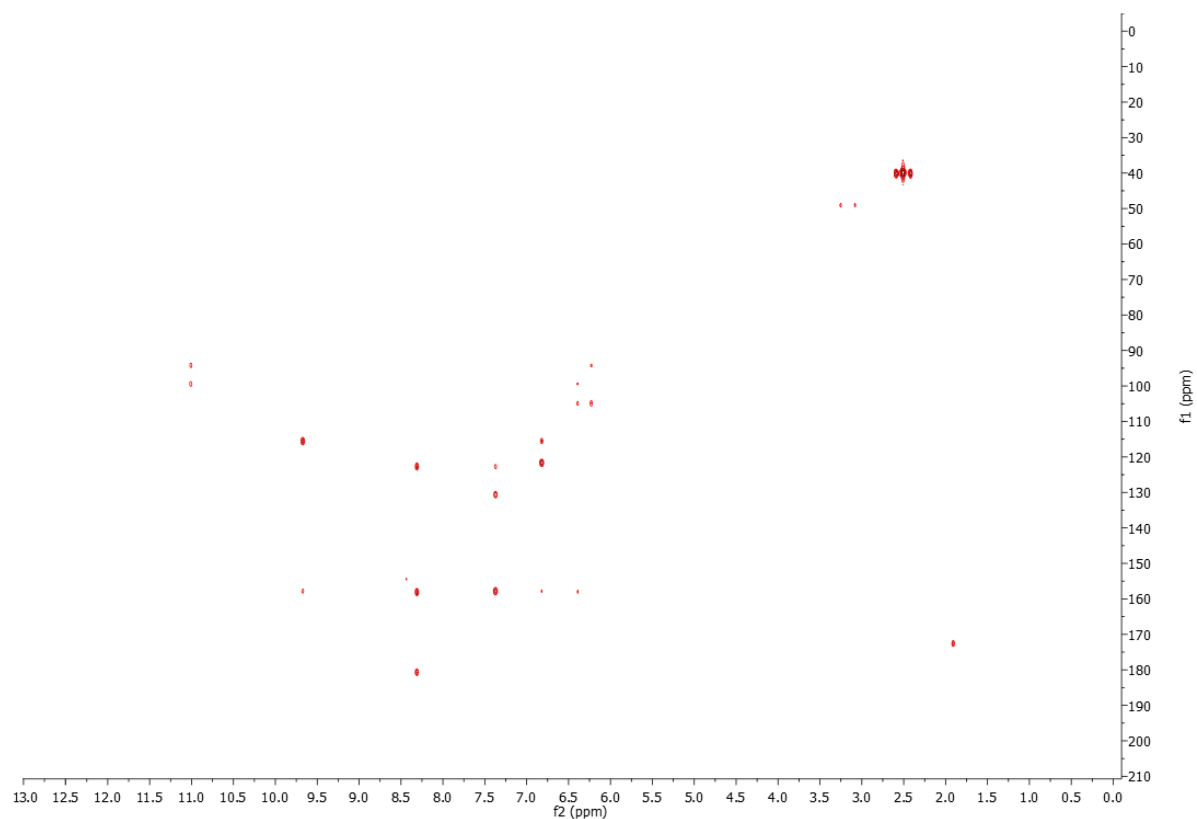

**Table S8** Experimental NMR data of compound 8 in DMSO -  $d_6$  at 25°C

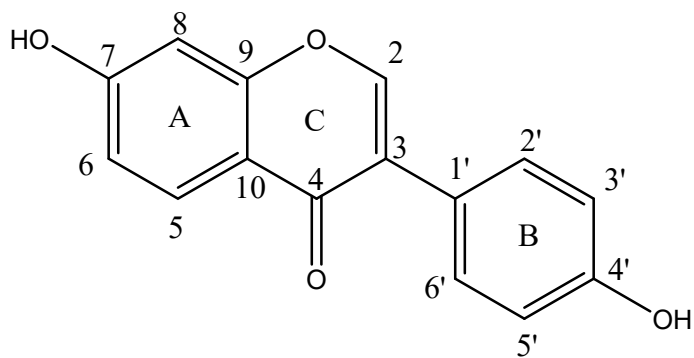

| Part<br>(ring) | Position | $\delta_C$ | $\delta_H$ (J in Hz)   |
|----------------|----------|------------|------------------------|
| C              | 2        |            |                        |
| C              | 3        | 123.9      | -                      |
| C              | 4        | 175.6      | -                      |
| A              | 5        | 128.8      | 7.94, d, 7.9J          |
| A              | 6        | 115.3      | 6.94, dd, 2.27J, 8.88J |
| A              | 7        | 163.3      | -                      |
| A              | 8        | 102.6      | 6.82, d, 3.28J         |
| A, C           | 9        | 157.7      | -                      |
| A, C           | 10       | 117.3      | -                      |
| B              | 1'       | 123.9      | -                      |
| B              | 2'       | 130.8      | 7.38, d, 8.8J          |
| B              | 3'       | 115.6      | 6.80, d, 8.8J          |
| B              | 4'       | 157.7      | -                      |

|   |       |       |                               |
|---|-------|-------|-------------------------------|
| B | 5'    | 115.6 | 6.80, <i>d</i> , 8.8 <i>J</i> |
| B | 6'    | 130.8 | 7.38, <i>d</i> , 8.8 <i>J</i> |
|   | 7-OH  | -     | 10.76, <i>s</i>               |
|   | 4'-OH | -     | 9.53, <i>s</i>                |

**Figure S36** (+)-LRESIMS spectrum of compound 8

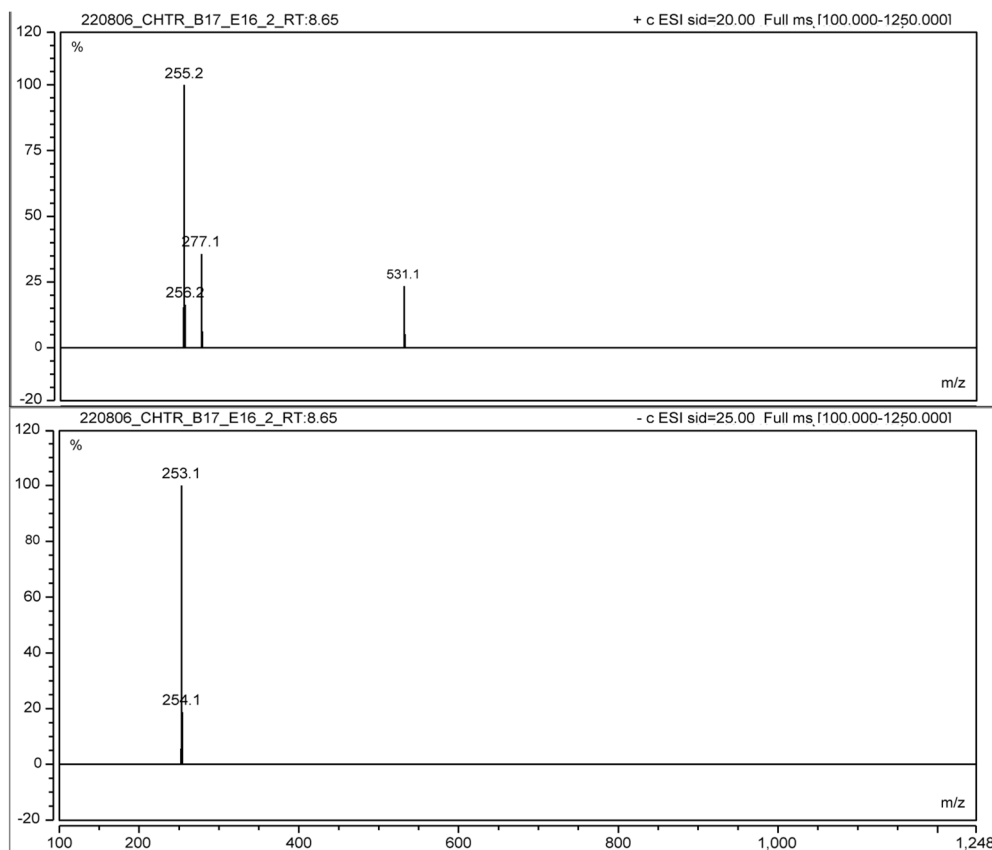

**Figure S37**  $^1\text{H}$  NMR (800 MHz, DMSO) spectrum of compound 8

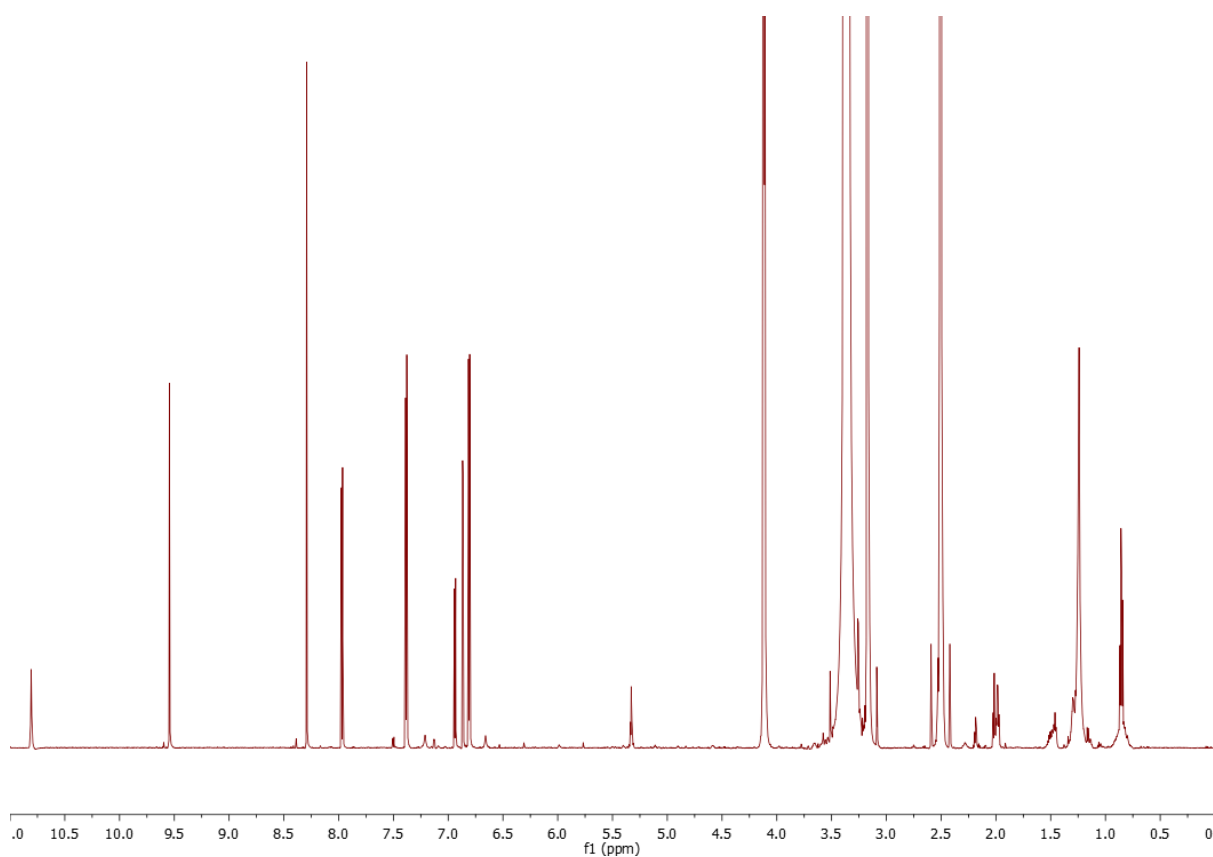

**Figure S38**  $^1\text{H}$  -  $^1\text{H}$  COSY spectrum of compound 8 in DMSO

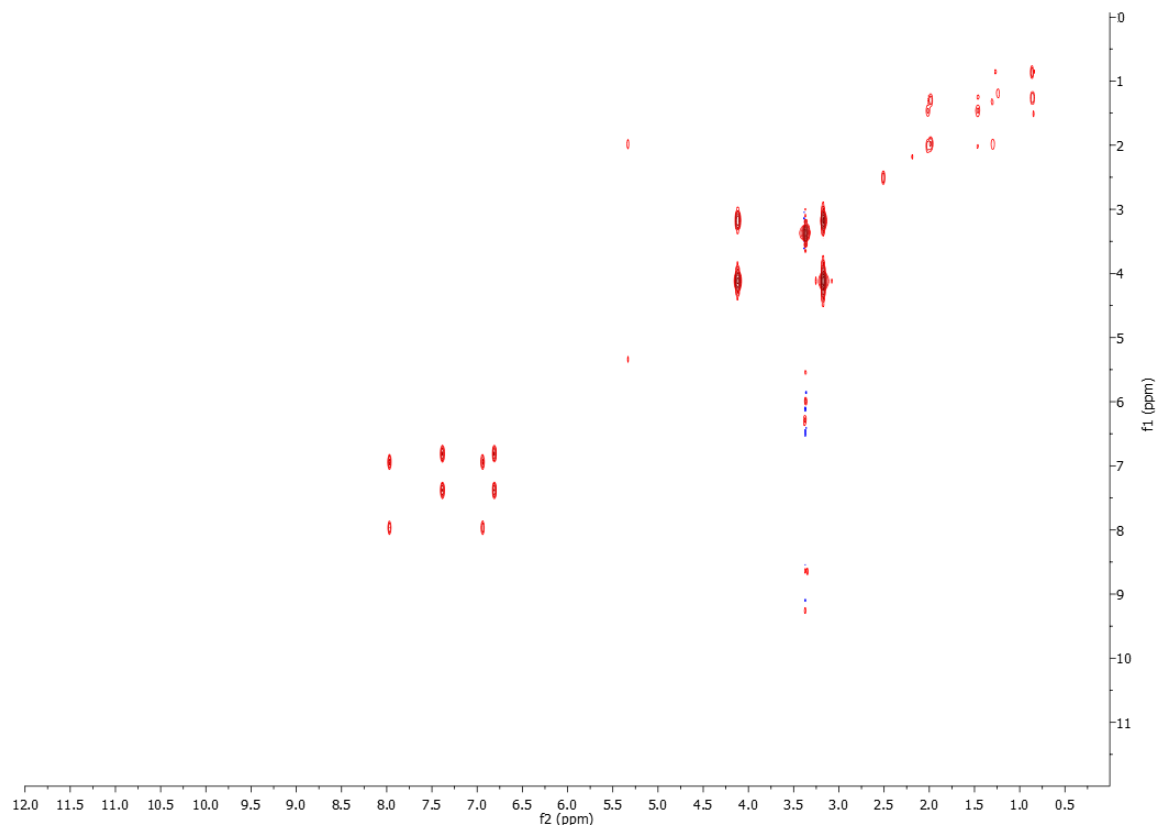

**Figure S39** HSQC spectrum of compound 8 in DMSO

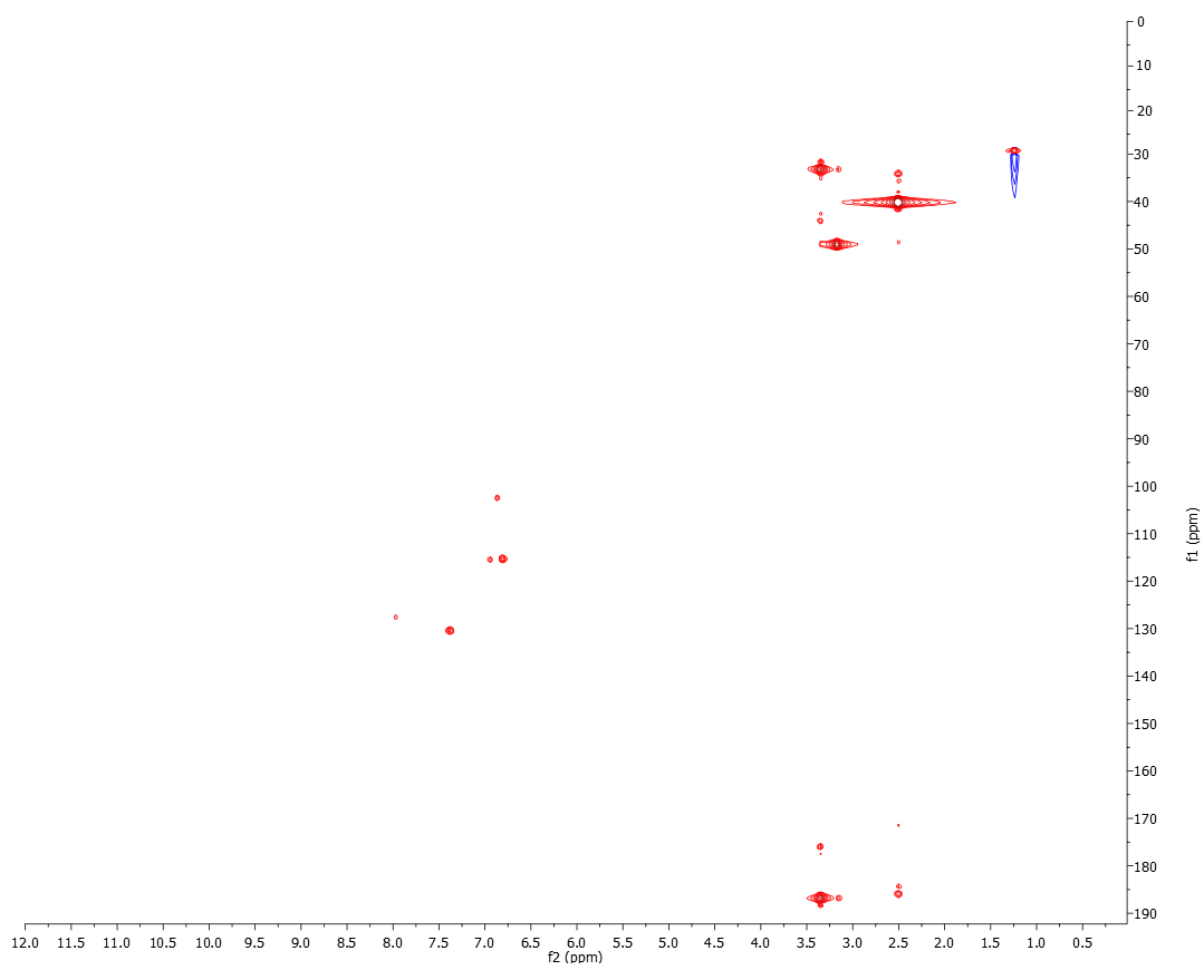

**Figure S40** HMBC spectrum of compound 8 in DMSO

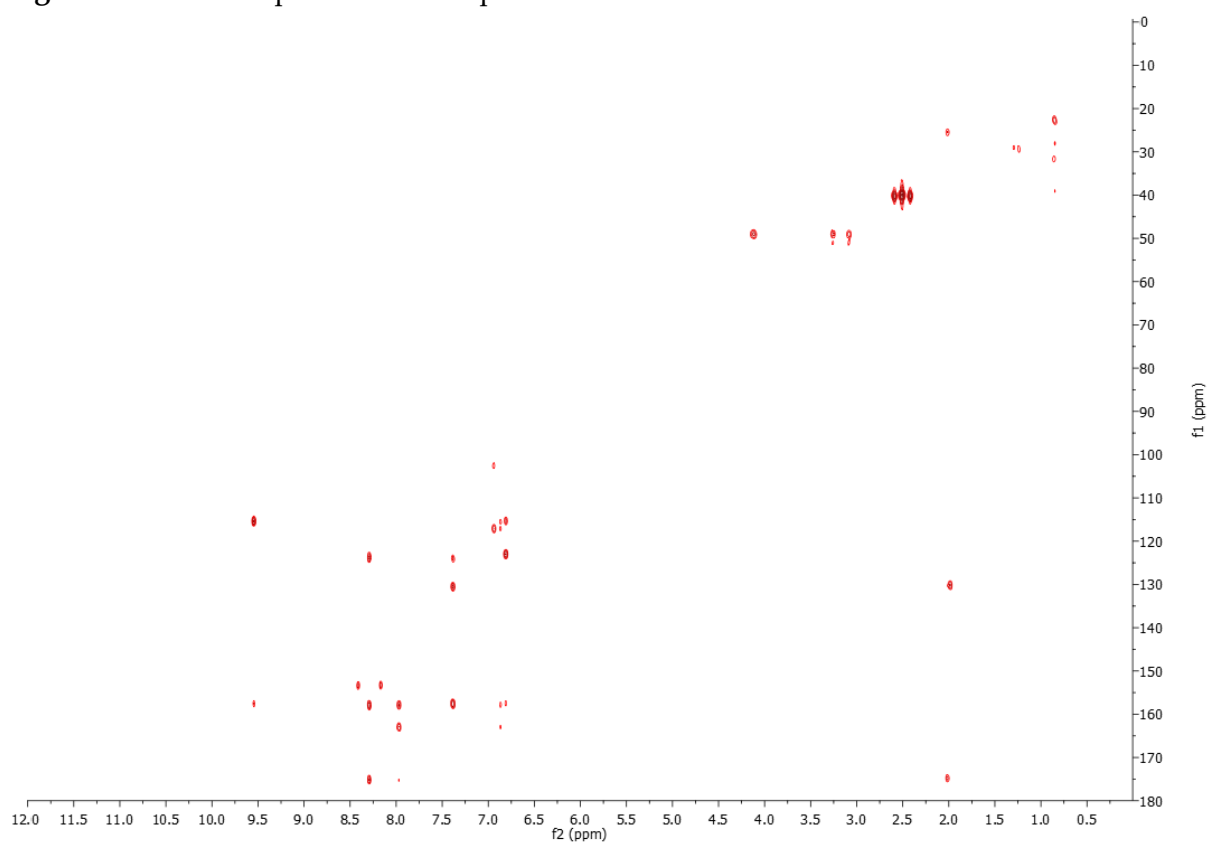

**Figure S41** LC-MS chromatograms of caecum extracts produced from a single animal sample fed with *Bacillus* composition F1.

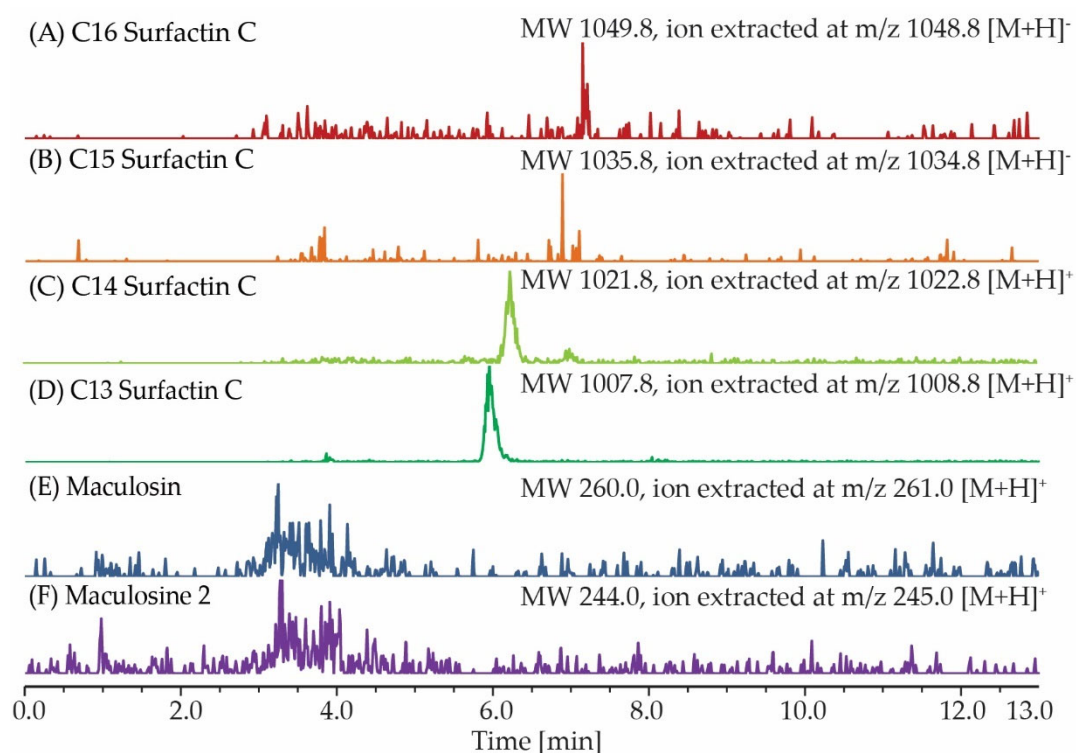

**Table S9** Antimicrobial activity of EtoAc and Crude extracts of *Bacillus* strains

EtoAc Extract

| Strain | 200µg/mL |     |     |     |     | 100µg/mL |     |     |     |     | 50µg/mL |     |     |     |     | 25µg/mL |     |     |     |     |
|--------|----------|-----|-----|-----|-----|----------|-----|-----|-----|-----|---------|-----|-----|-----|-----|---------|-----|-----|-----|-----|
|        | C.P      | E.C | P.A | S.A | S.E | C.P      | E.C | P.A | S.A | S.E | C.P     | E.C | P.A | S.A | S.E | C.P     | E.C | P.A | S.A | S.E |
| BPR-17 | ✓        | ✓   | ✓   | ✓   | ✓   | ✓        | ✓   | ✓   | ✓   | ✓   | ✓       | ✓   | ✗   | ✓   | ✗   | ✓       | ✓   | ✗   | ✓   | ✗   |
| BPR-16 | ✓        | ✓   | ✓   | ✓   | ✓   | ✓        | ✓   | ✓   | ✓   | ✓   | ✓       | ✓   | ✗   | ✓   | ✗   | ✓       | ✓   | ✗   | ✓   | ✗   |
| BPR-14 | ✓        | ✓   | ✗   | ✓   | ✗   | ✓        | ✓   | ✗   | ✓   | ✗   | ✓       | ✓   | ✗   | ✓   | ✗   | ✓       | ✓   | ✗   | ✓   | ✗   |
| BPR-13 | ✗        | ✗   | ✗   | ✗   | ✗   | ✗        | ✗   | ✗   | ✗   | ✗   | ✗       | ✗   | ✗   | ✗   | ✗   | ✗       | ✗   | ✗   | ✗   | ✗   |
| BPR-12 | ✗        | ✗   | ✗   | ✗   | ✗   | ✗        | ✗   | ✗   | ✗   | ✗   | ✗       | ✗   | ✗   | ✗   | ✗   | ✗       | ✗   | ✗   | ✗   | ✗   |
| BPR-11 | ✓        | ✓   | ✗   | ✓   | ✗   | ✓        | ✓   | ✗   | ✓   | ✗   | ✓       | ✓   | ✗   | ✓   | ✗   | ✓       | ✓   | ✗   | ✓   | ✗   |

### Crude Extract

[illegible]

**Figure S42** Stacked  $^1\text{H}$  NMR spectra of *Bacillus* EtoAC extracts

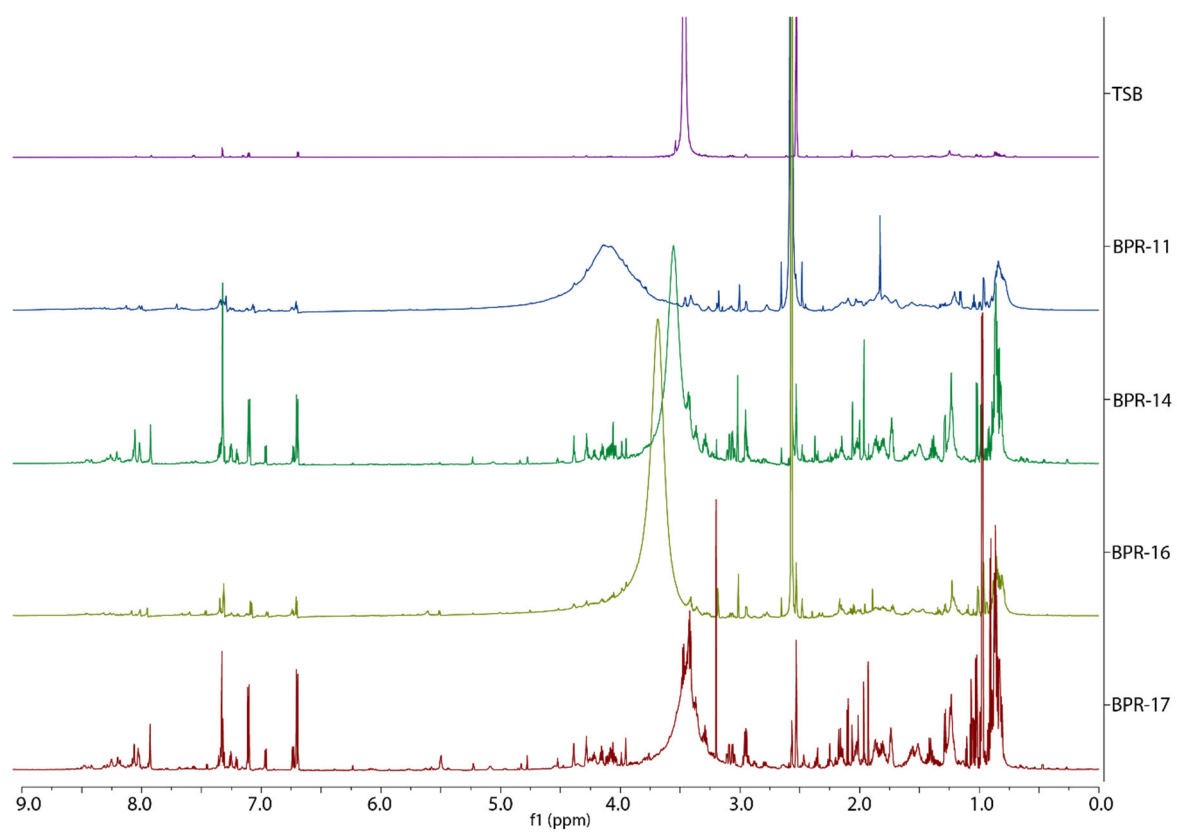

Supplement: s1 [file s1]
